# Supplementary material
Source: PubMed Central journal article supplement (PMC4084848)
Supplement: jo500944g_si_001.pdf [file jo500944g_si_001.pdf]

## Supporting Information: Synthesis of Cross-linked DNA Containing Oxidized Abasic Site Analogues

Souradyuti Ghosh and Marc M. Greenberg\*

Department of Chemistry, Johns Hopkins University, 3400 N. Charles St., Baltimore MD 21218.

mgreenberg@jhu.edu

### Contents:

|                                                                                                                                                             |       |
|-------------------------------------------------------------------------------------------------------------------------------------------------------------|-------|
| 1. <b>Figure S1.</b> $^1\text{H}$ and $^{13}\text{C}$ NMR spectra of <b>10</b> .                                                                            | (S2)  |
| 2. <b>Figure S2.</b> $^1\text{H}$ and $^{13}\text{C}$ NMR spectra of levulinyl protected <b>10</b> .                                                        | (S3)  |
| 3. <b>Figure S3.</b> $^1\text{H}$ and $^{13}\text{C}$ NMR spectra of nitroveratryloxycarbonyl protected <b>10</b> .                                         | (S4)  |
| 4. <b>Figure S4.</b> $^1\text{H}$ and $^{13}\text{C}$ NMR spectra of <b>12a</b> .                                                                           | (S5)  |
| 5. <b>Figure S5.</b> $^1\text{H}$ and $^{13}\text{C}$ NMR spectra of <b>12b</b> .                                                                           | (S6)  |
| 6. <b>Figure S6.</b> $^1\text{H}$ and $^{13}\text{C}$ NMR spectra of <b>13a</b> .                                                                           | (S7)  |
| 7. <b>Figure S7.</b> $^1\text{H}$ and $^{13}\text{C}$ NMR spectra of <b>13b</b> .                                                                           | (S8)  |
| 8. <b>Figure S8.</b> $^1\text{H}$ and $^{31}\text{P}$ NMR spectra of <b>5a</b> .                                                                            | (S9)  |
| 9. <b>Figure S9.</b> $^1\text{H}$ and $^{31}\text{P}$ NMR spectra of <b>5b</b> .                                                                            | (S10) |
| 10. <b>Figure S10.</b> $^1\text{H}$ and $^{13}\text{C}$ NMR spectra of <b>28</b> .                                                                          | (S11) |
| 11. <b>Figure S11.</b> $^1\text{H}$ and $^{13}\text{C}$ NMR spectra of DMT protected <b>28</b> .                                                            | (S12) |
| 12. <b>Figure S12.</b> $^1\text{H}$ and $^{13}\text{C}$ NMR spectra of <b>29</b> .                                                                          | (S13) |
| 13. <b>Figure S13.</b> $^1\text{H}$ and $^{13}\text{C}$ NMR spectra of DMT deprotected <b>29</b> .                                                          | (S14) |
| 14. <b>Figure S14.</b> $^1\text{H}$ and $^{13}\text{C}$ NMR spectra of <b>30</b> .                                                                          | (S15) |
| 15. <b>Figure S15.</b> $^1\text{H}$ and $^{13}\text{C}$ NMR spectra of <b>31</b> .                                                                          | (S16) |
| 16. <b>Figure S16.</b> $^1\text{H}$ and $^{13}\text{C}$ NMR spectra of DMT protected <b>31</b> .                                                            | (S17) |
| 17. <b>Figure S17.</b> $^1\text{H}$ and $^{31}\text{P}$ NMR spectra of <b>32</b> .                                                                          | (S18) |
| 18. <b>Figure S18.</b> MALDI-TOF-MS of <b>14</b> .                                                                                                          | (S19) |
| 19. <b>Figure S19.</b> ESI-MS of <b>15</b> .                                                                                                                | (S19) |
| 20. <b>Figure S20.</b> ESI-MS of <b>16</b> .                                                                                                                | (S20) |
| 21. <b>Figure S21.</b> MALDI-TOF-MS of <b>17</b> .                                                                                                          | (S20) |
| 22. <b>Figure S22.</b> MALDI-TOF-MS of <b>18</b> .                                                                                                          | (S21) |
| 23. <b>Figure S23.</b> ESI-MS of <b>19</b> .                                                                                                                | (S21) |
| 24. <b>Figure S24.</b> ESI-MS of <b>20</b> .                                                                                                                | (S22) |
| 25. <b>Figure S25.</b> MALDI-TOF-MS of <b>21</b> .                                                                                                          | (S23) |
| 26. <b>Figure S26.</b> MALDI-TOF-MS of <b>33</b> .                                                                                                          | (S23) |
| 27. <b>Figure S27.</b> ESI-MS of <b>34</b> .                                                                                                                | (S24) |
| 28. <b>Figure S28.</b> ESI-MS of <b>35</b> .                                                                                                                | (S25) |
| 29. <b>Figure S29.</b> <i>Rsa</i> I and <i>Taq</i> <sup>q</sup> I restriction enzyme sites on <b>40</b> .                                                   | (S25) |
| 30. <b>Figure S30.</b> Ligation for constructing 5'- <sup>32</sup> P- <b>40</b> and restriction enzyme treatment of purified 5'- <sup>32</sup> P- <b>40</b> | (S26) |

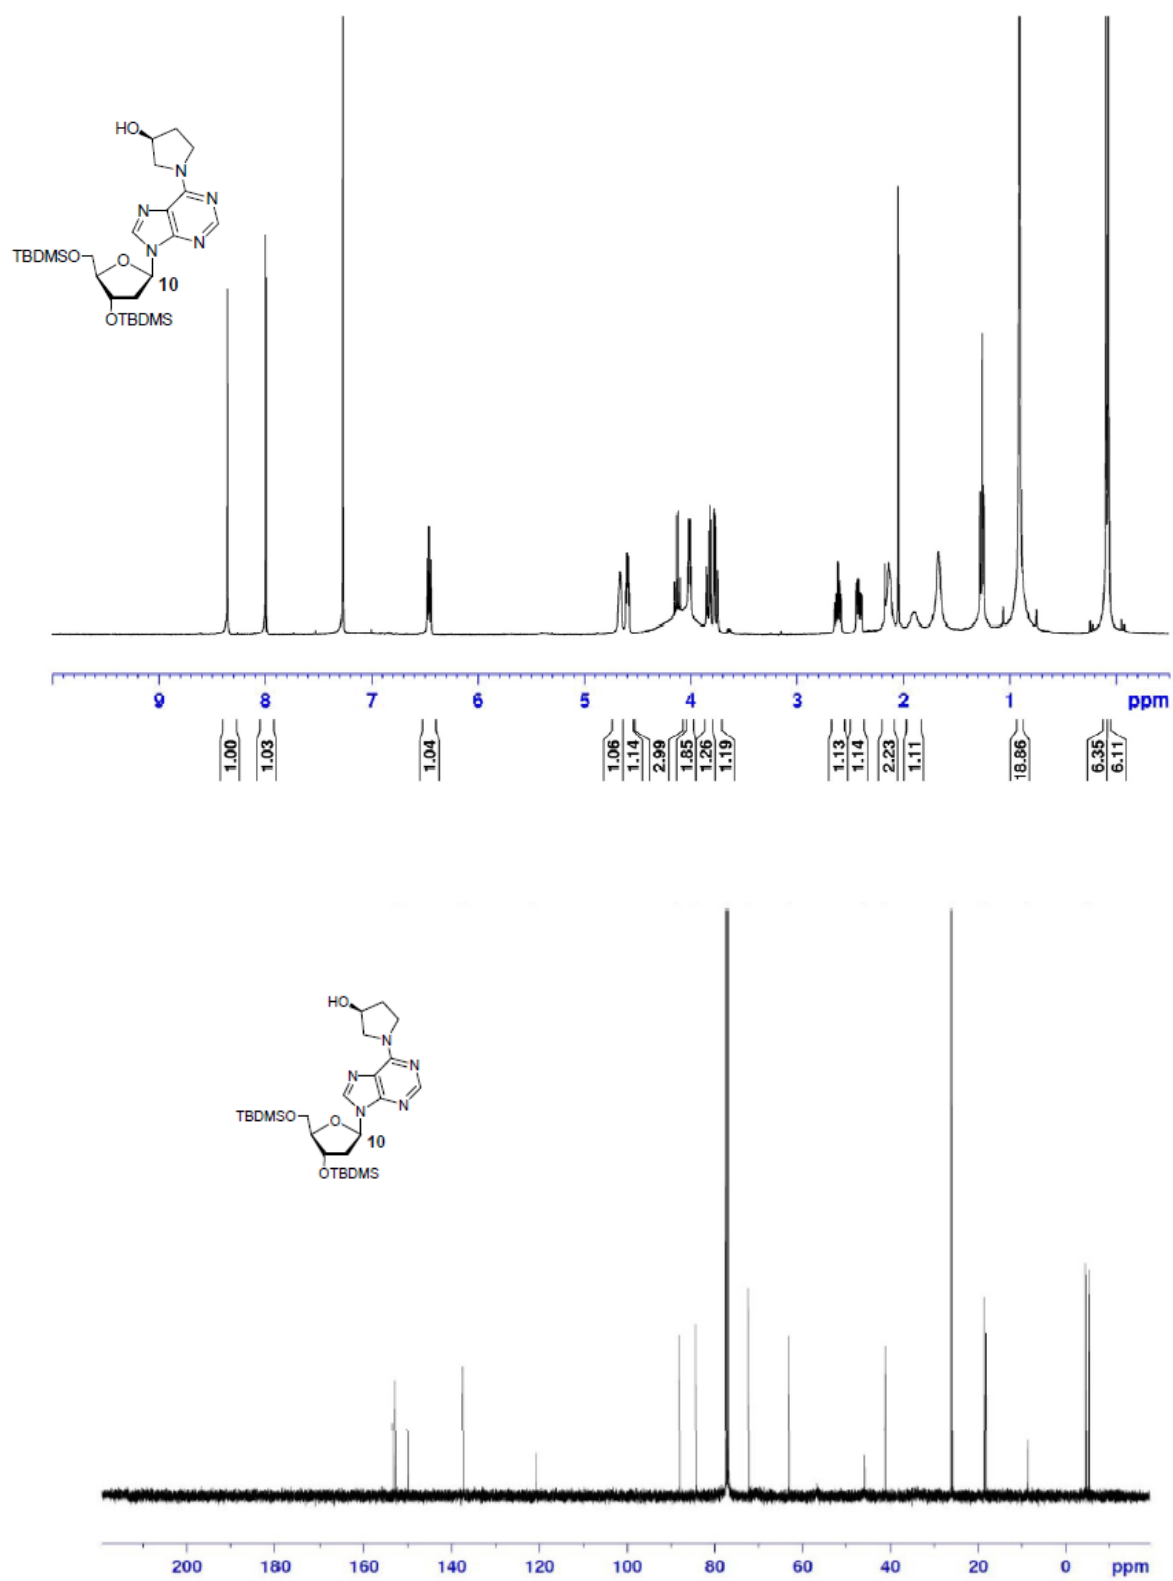

Figure S1.  $^1\text{H}$  and  $^{13}\text{C}$  NMR spectra of 10.

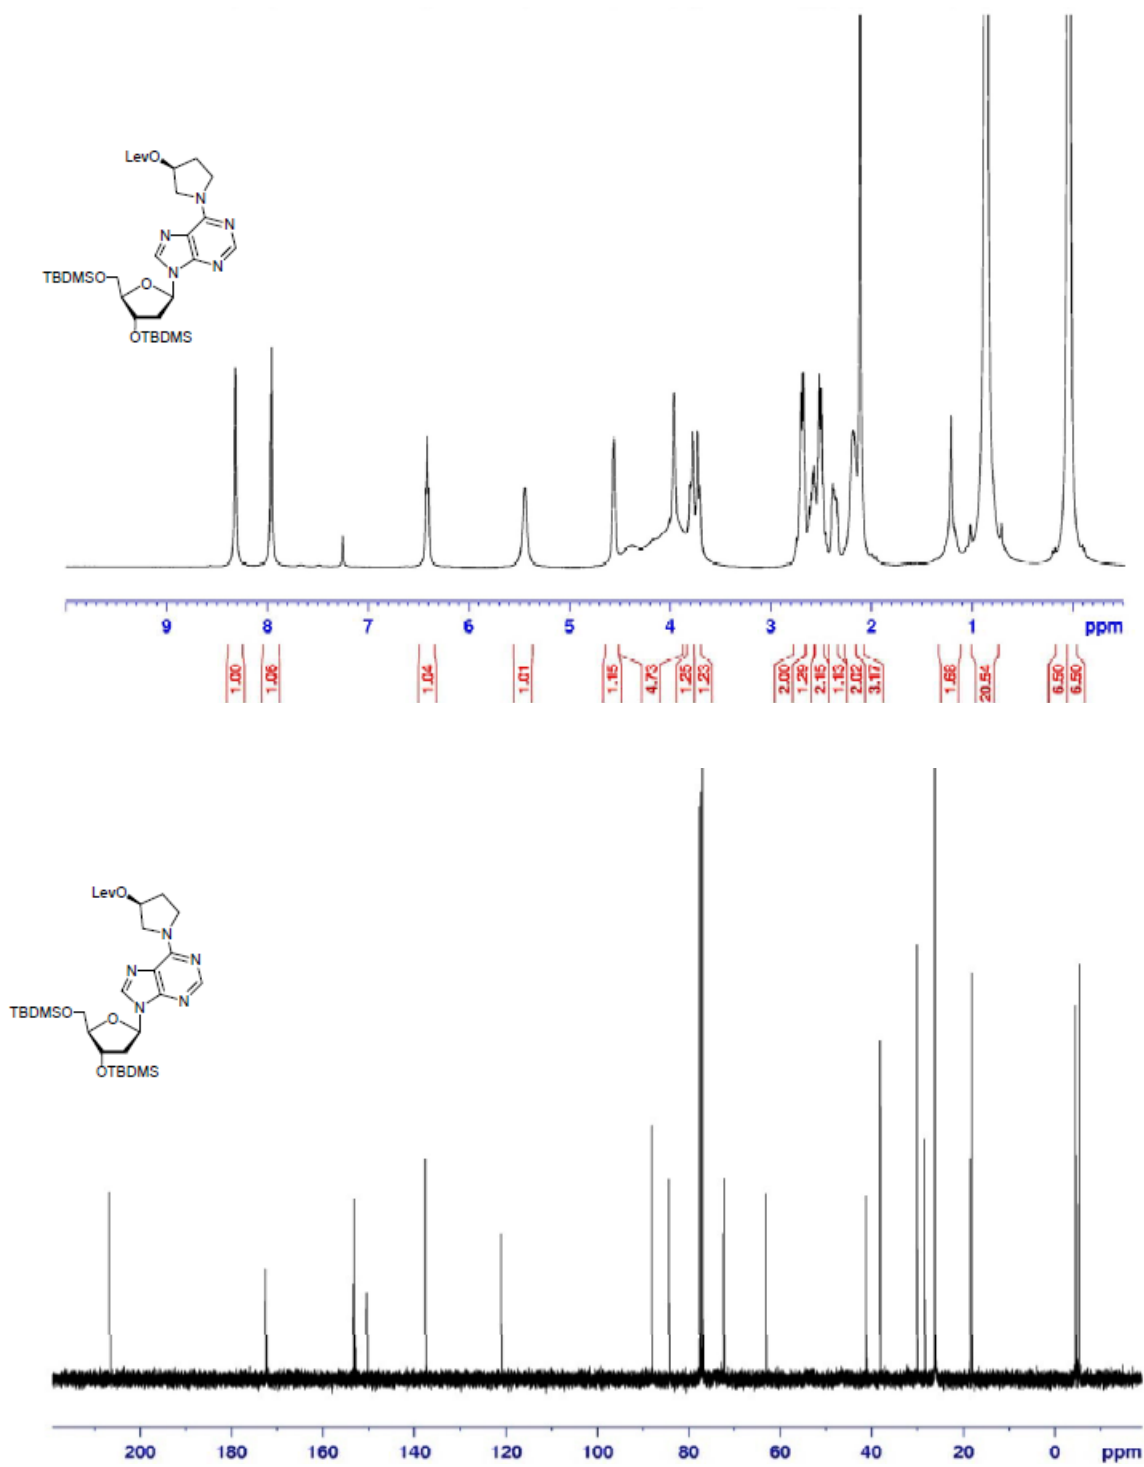

Figure S2.  $^1\text{H}$  and  $^{13}\text{C}$  NMR spectra of levulinyl protected 10.

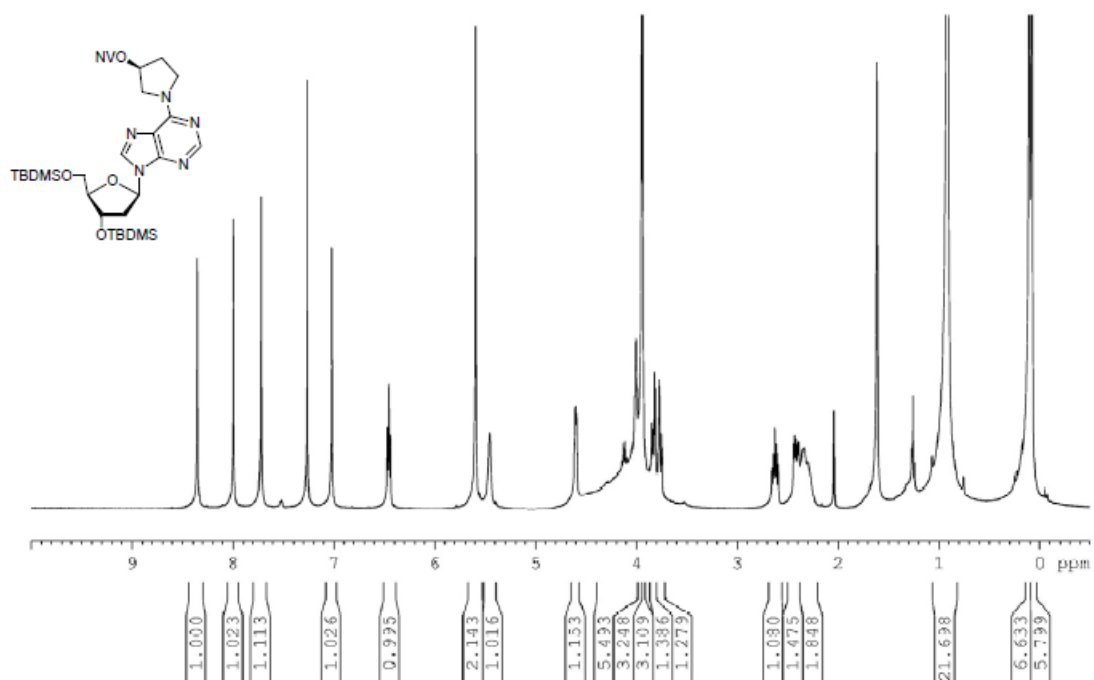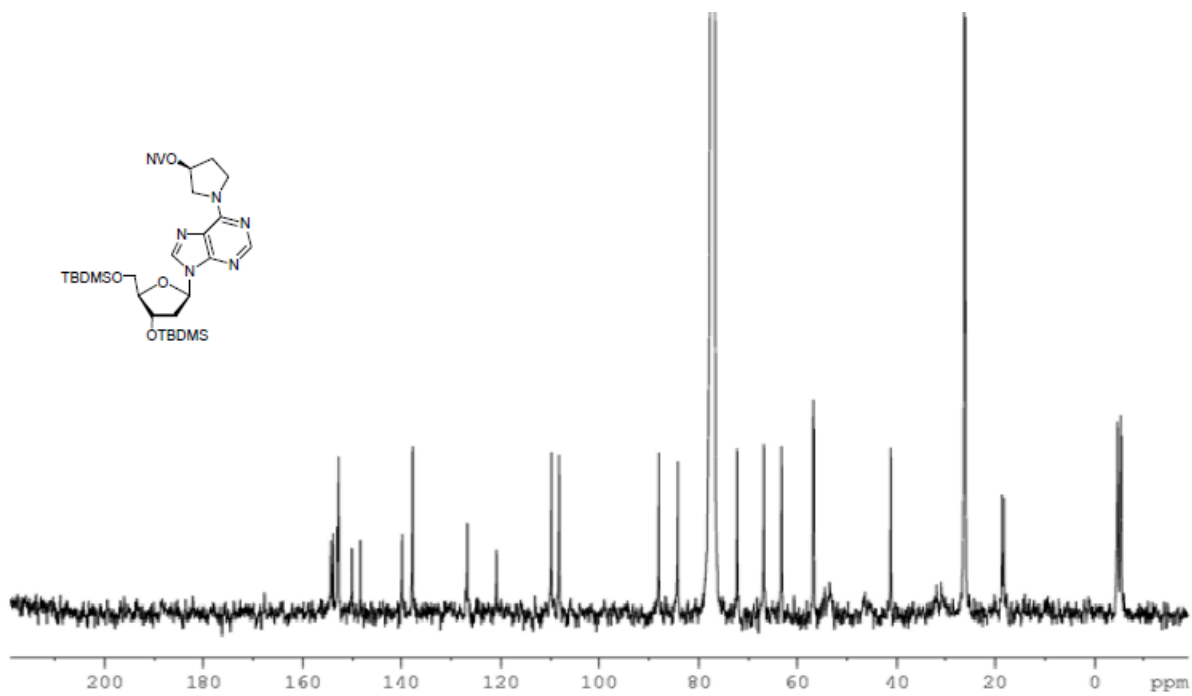

**Figure S3.** <sup>1</sup>H and <sup>13</sup>C NMR spectra of nitroveratryloxycarbonyl protected **10**.

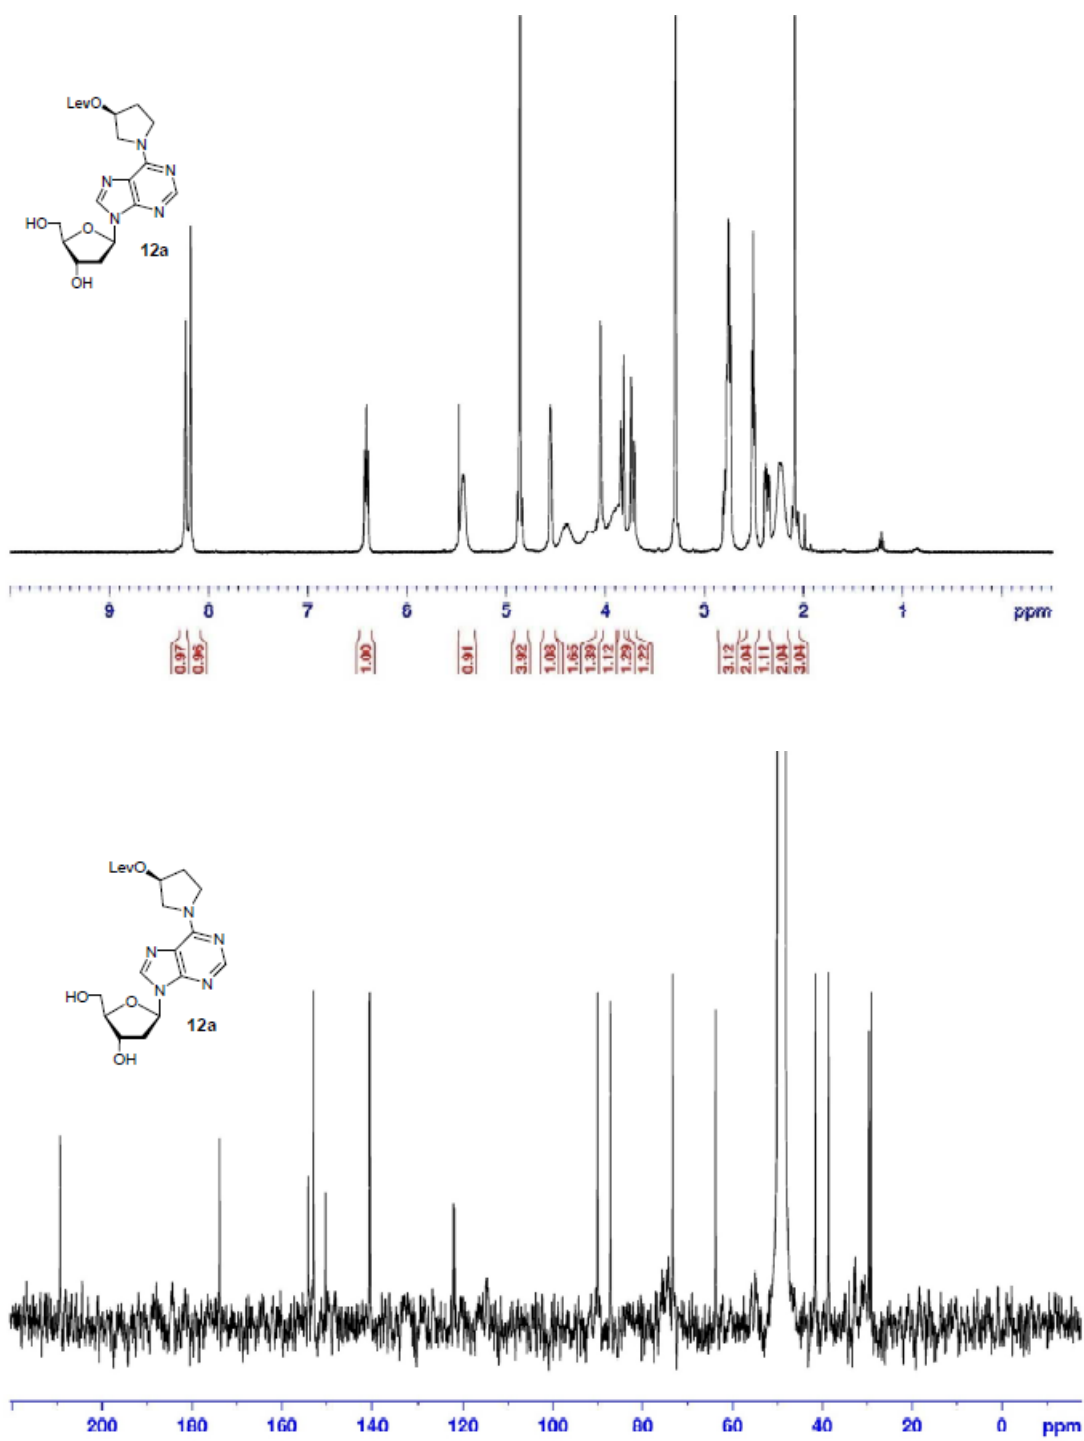

Figure S4.  $^1\text{H}$  and  $^{13}\text{C}$  NMR spectra of 12a.

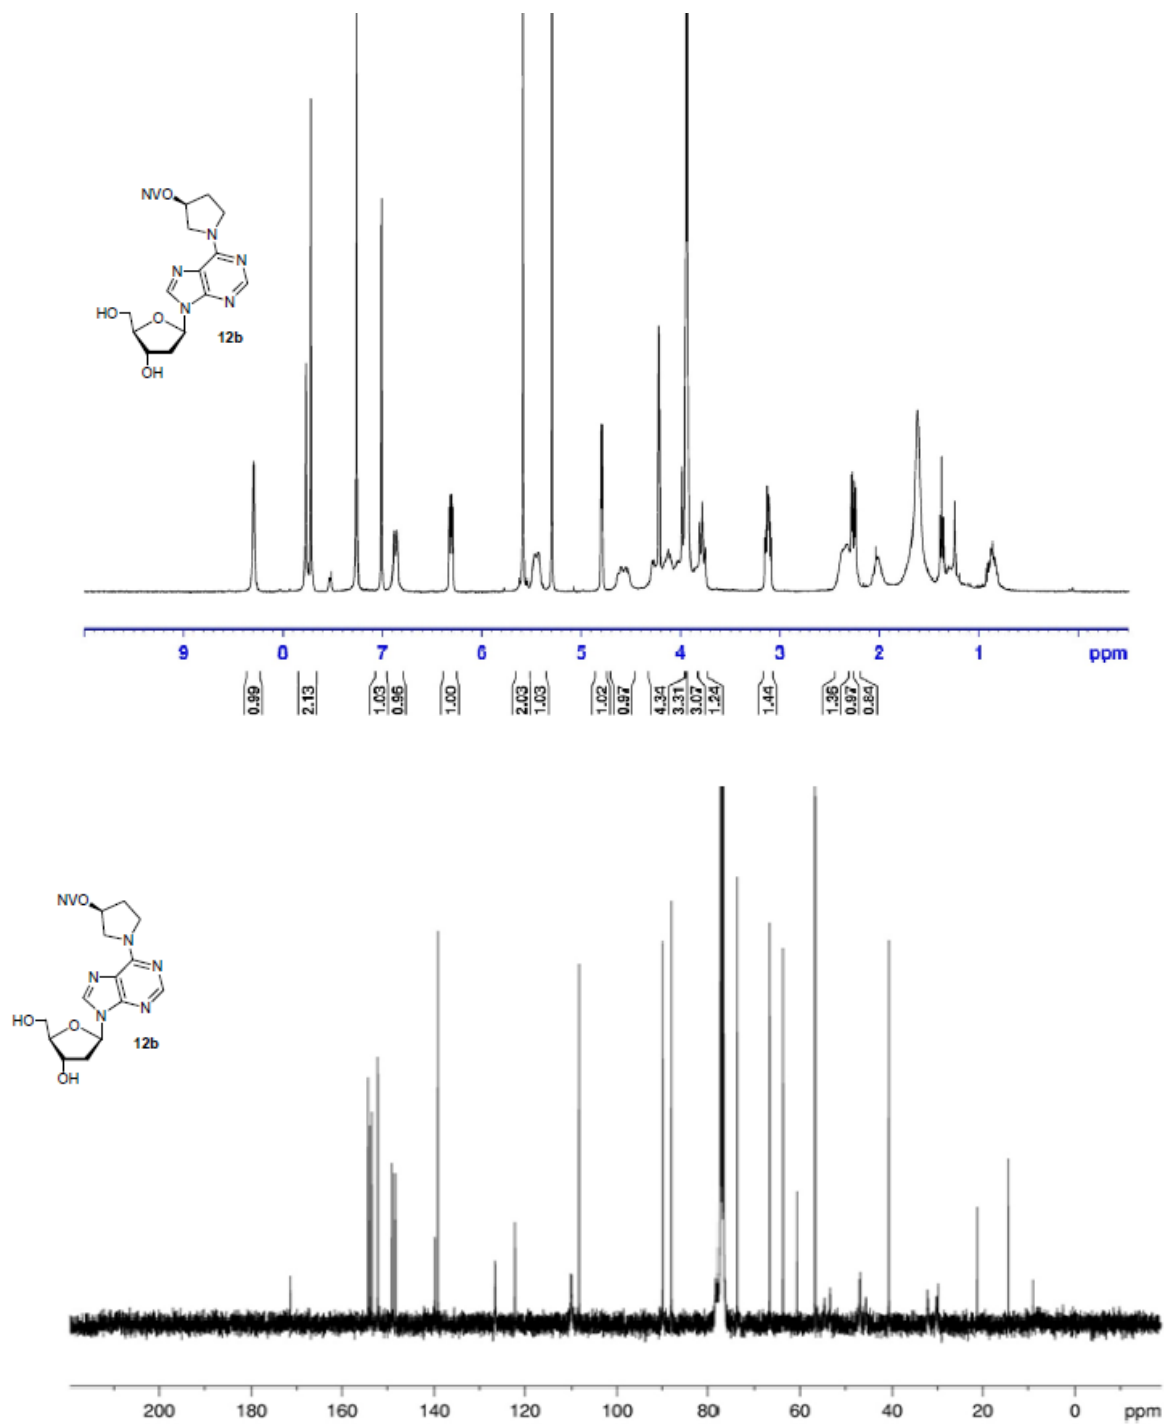

Figure S5.  $^1\text{H}$  and  $^{13}\text{C}$  NMR spectra of **12b**.

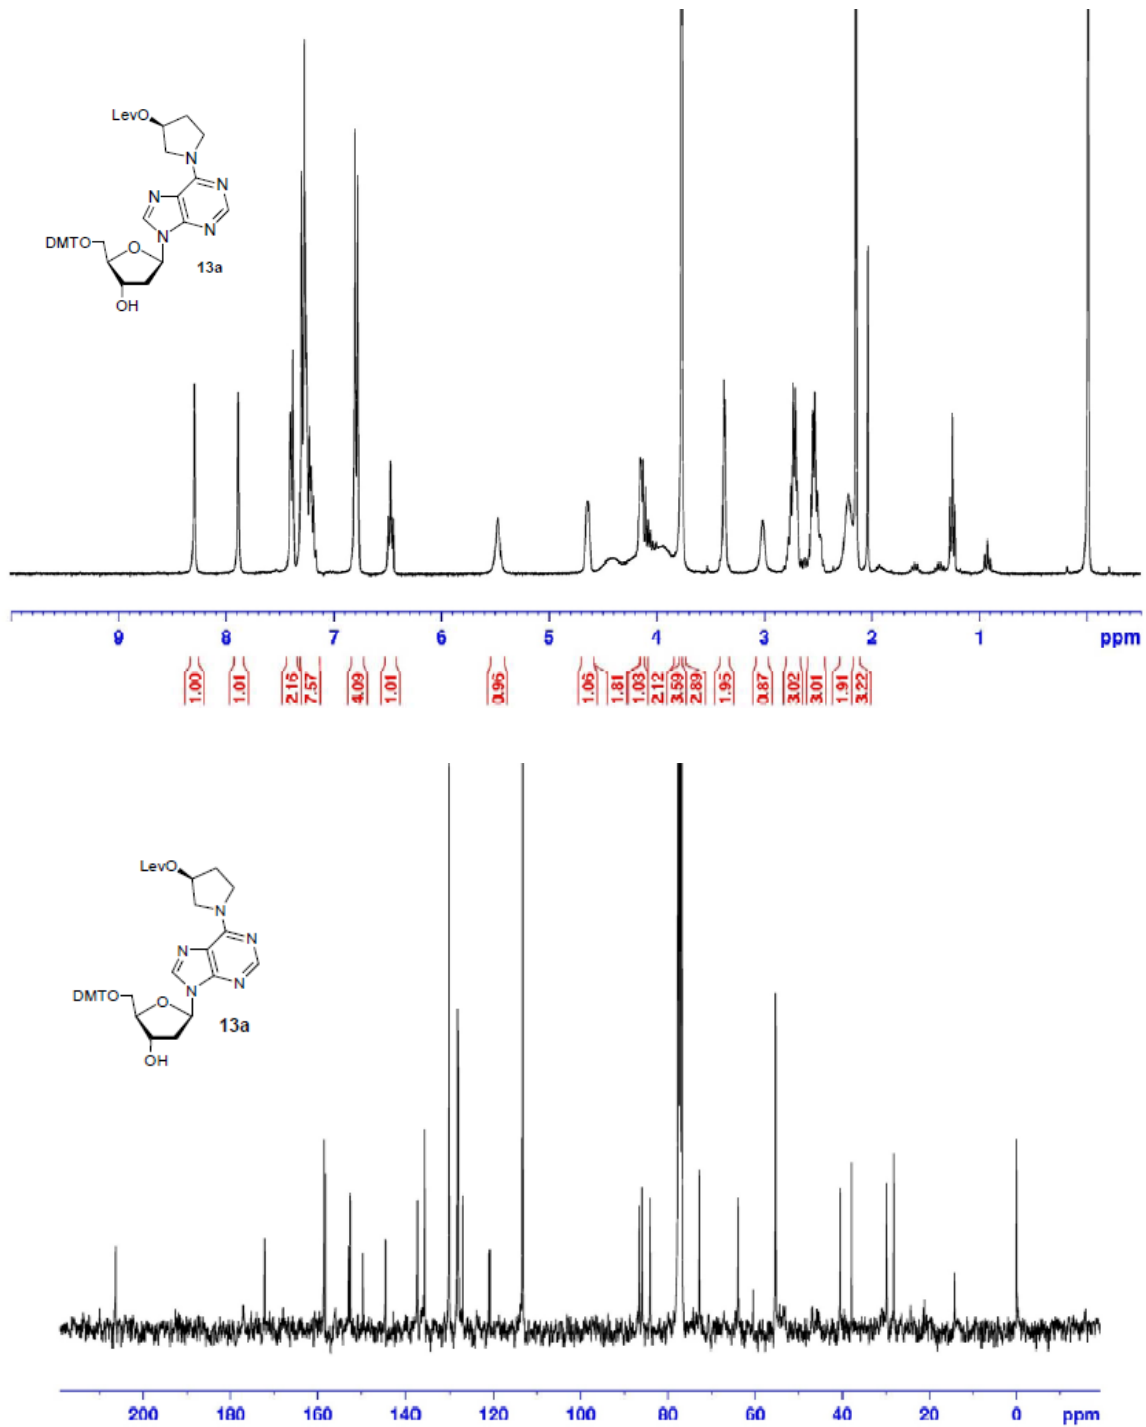

Figure S6. <sup>1</sup>H and <sup>13</sup>C NMR spectra of 13a.

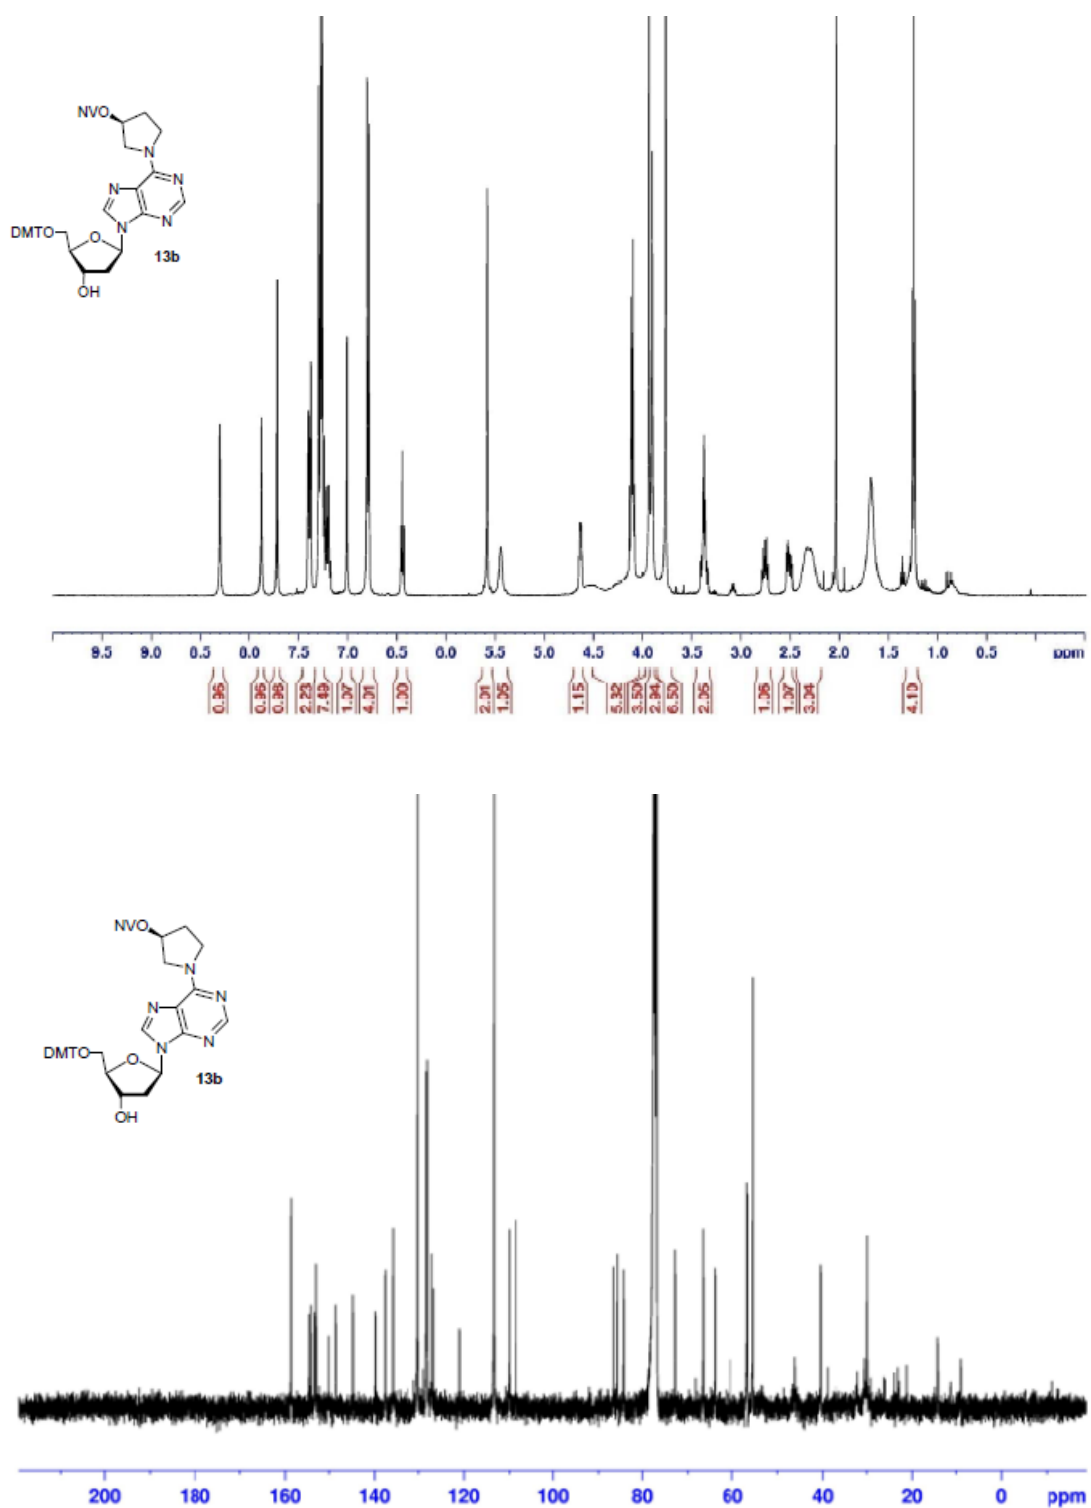

Figure S7.  $^1\text{H}$  and  $^{13}\text{C}$  NMR spectra of 13b.



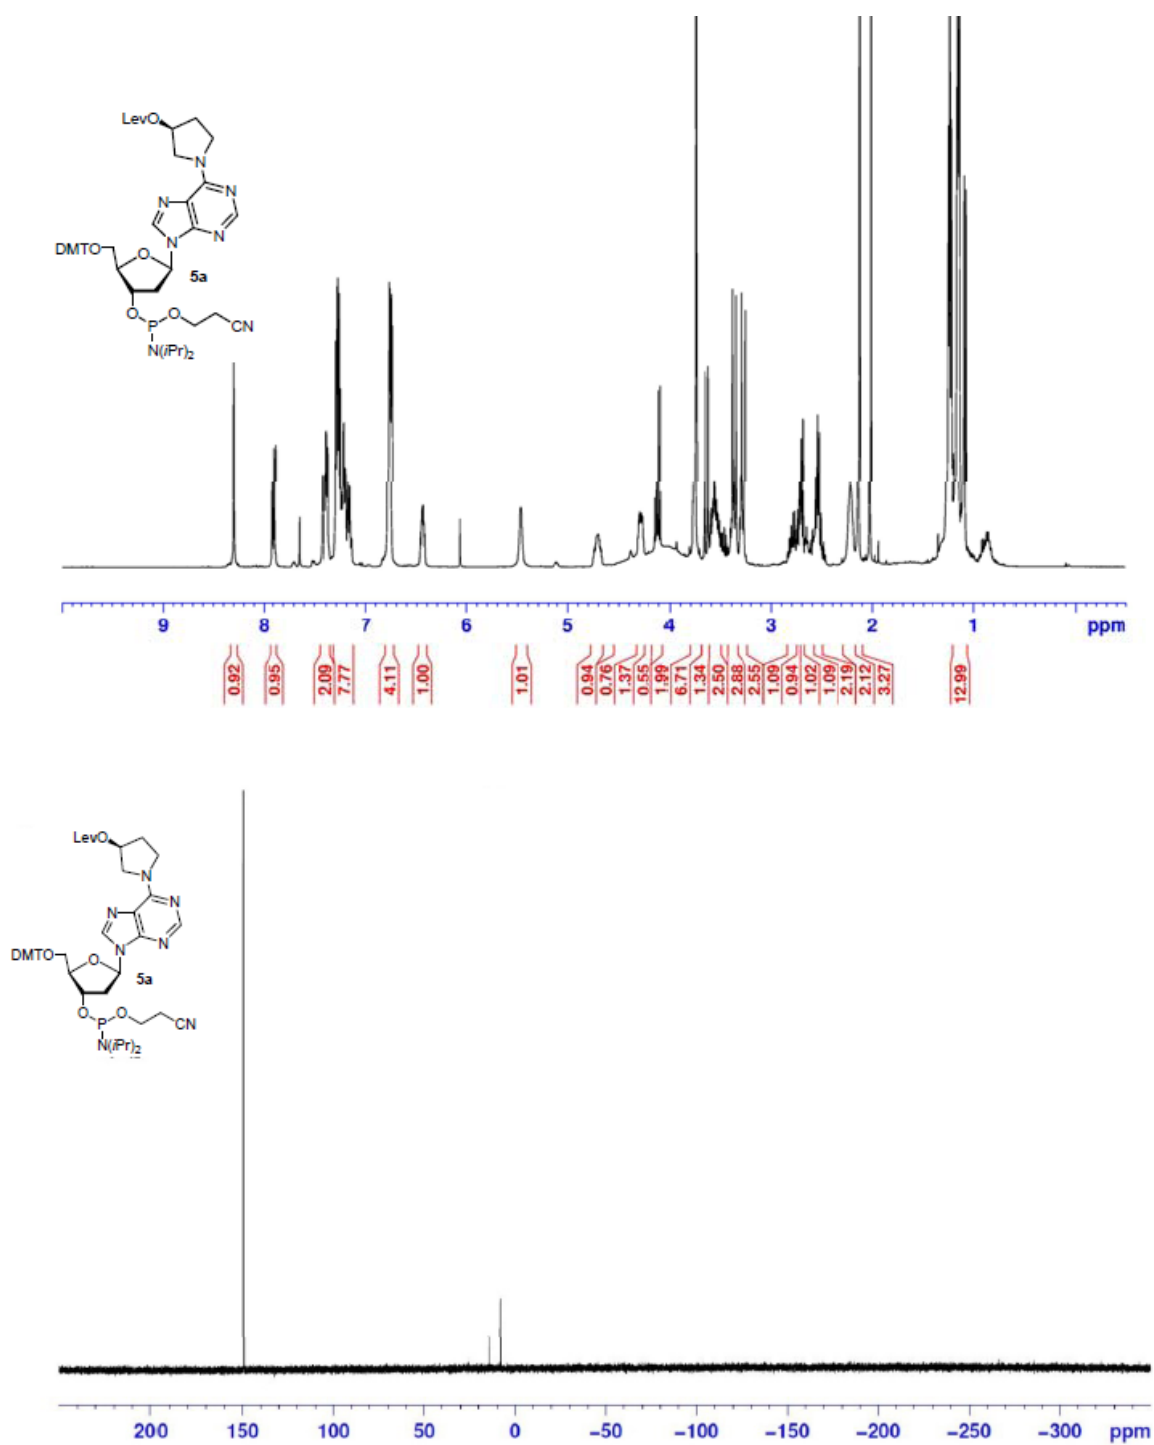

Figure S8.  $^1\text{H}$  and  $^{31}\text{P}$  NMR spectra of 5a.

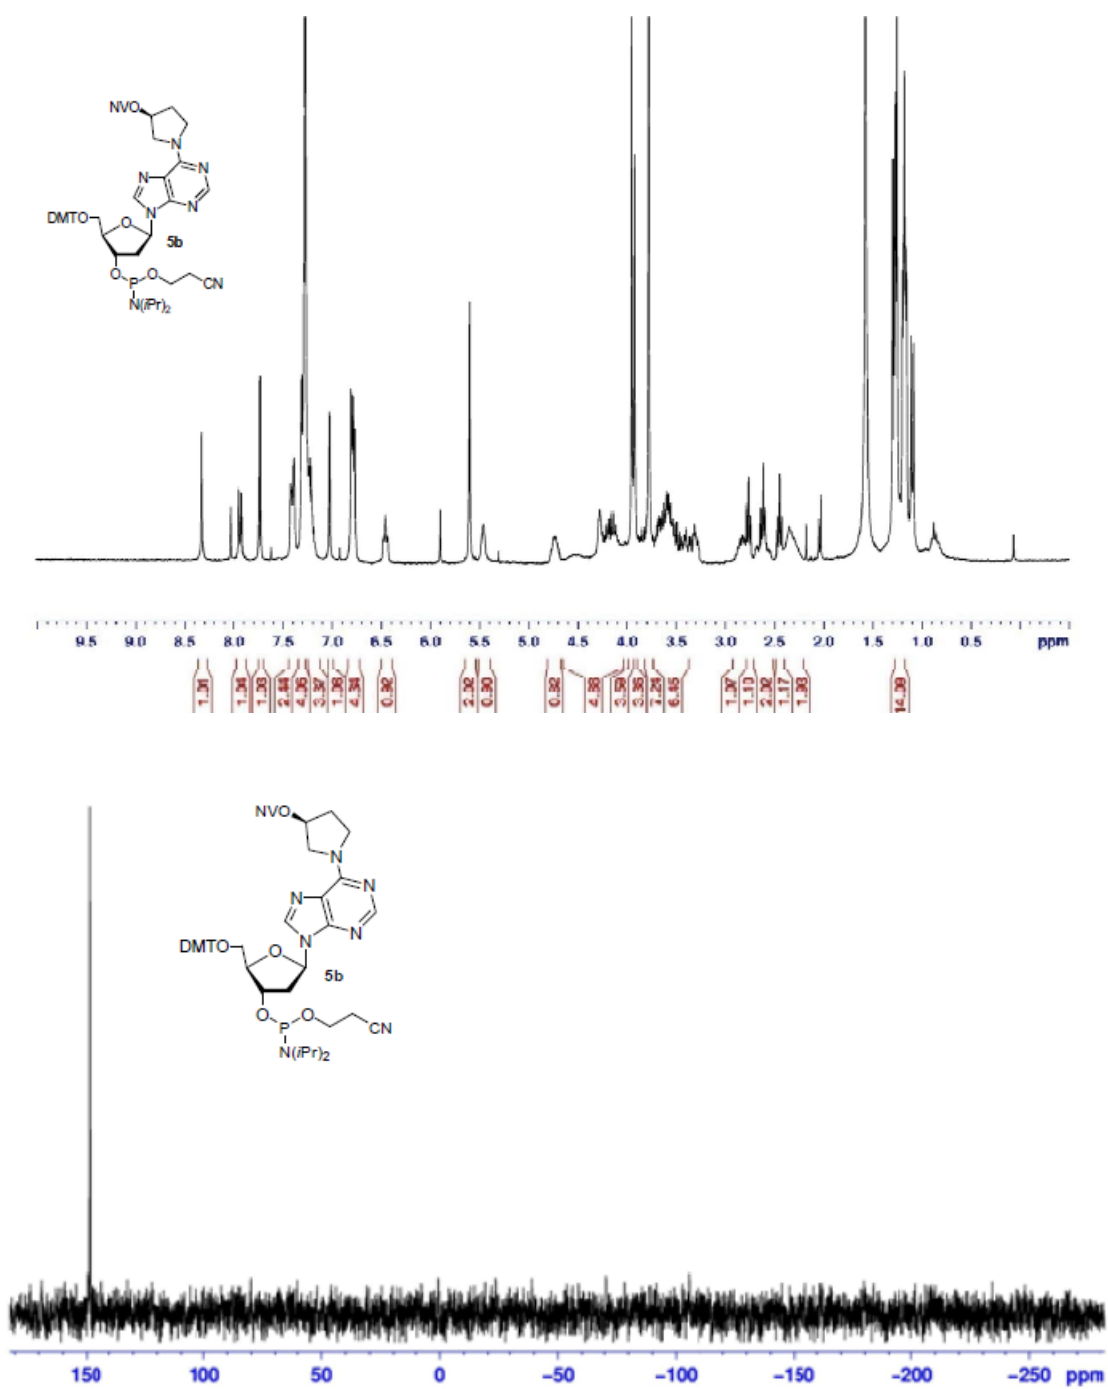

Figure S9. <sup>1</sup>H and <sup>31</sup>P NMR spectra of **5b**.

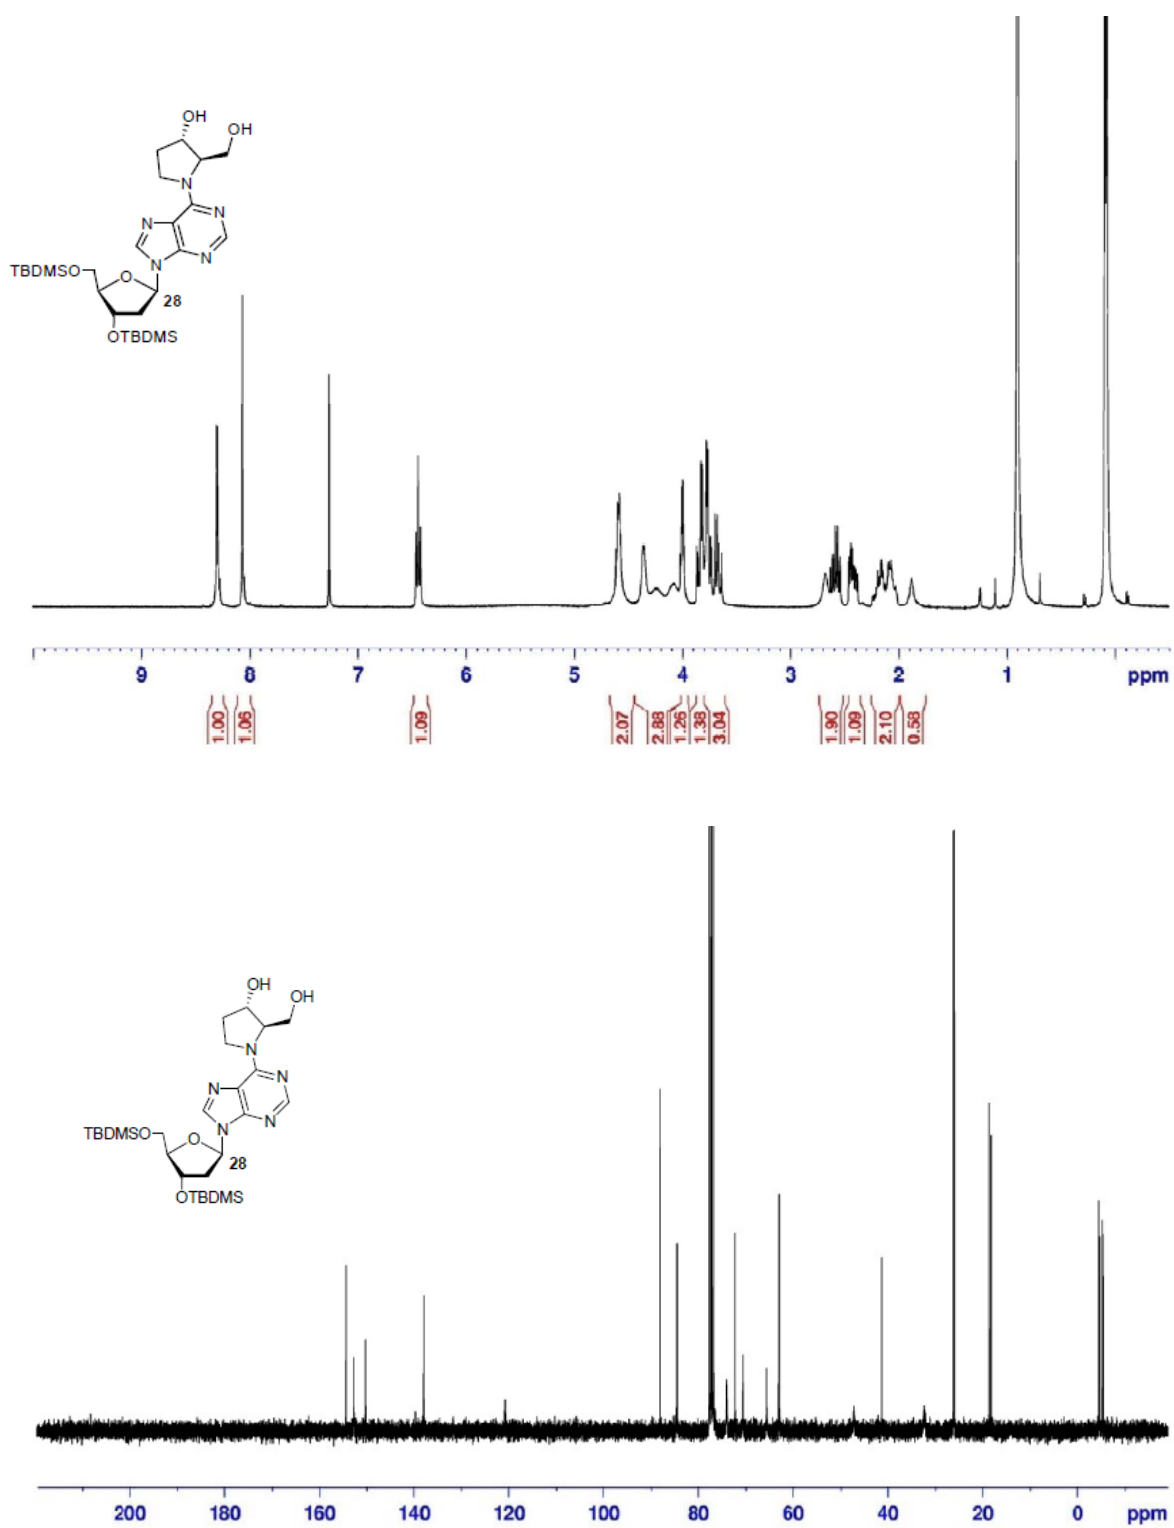

Figure S10.  $^1\text{H}$  and  $^{13}\text{C}$  NMR spectra of **28**.

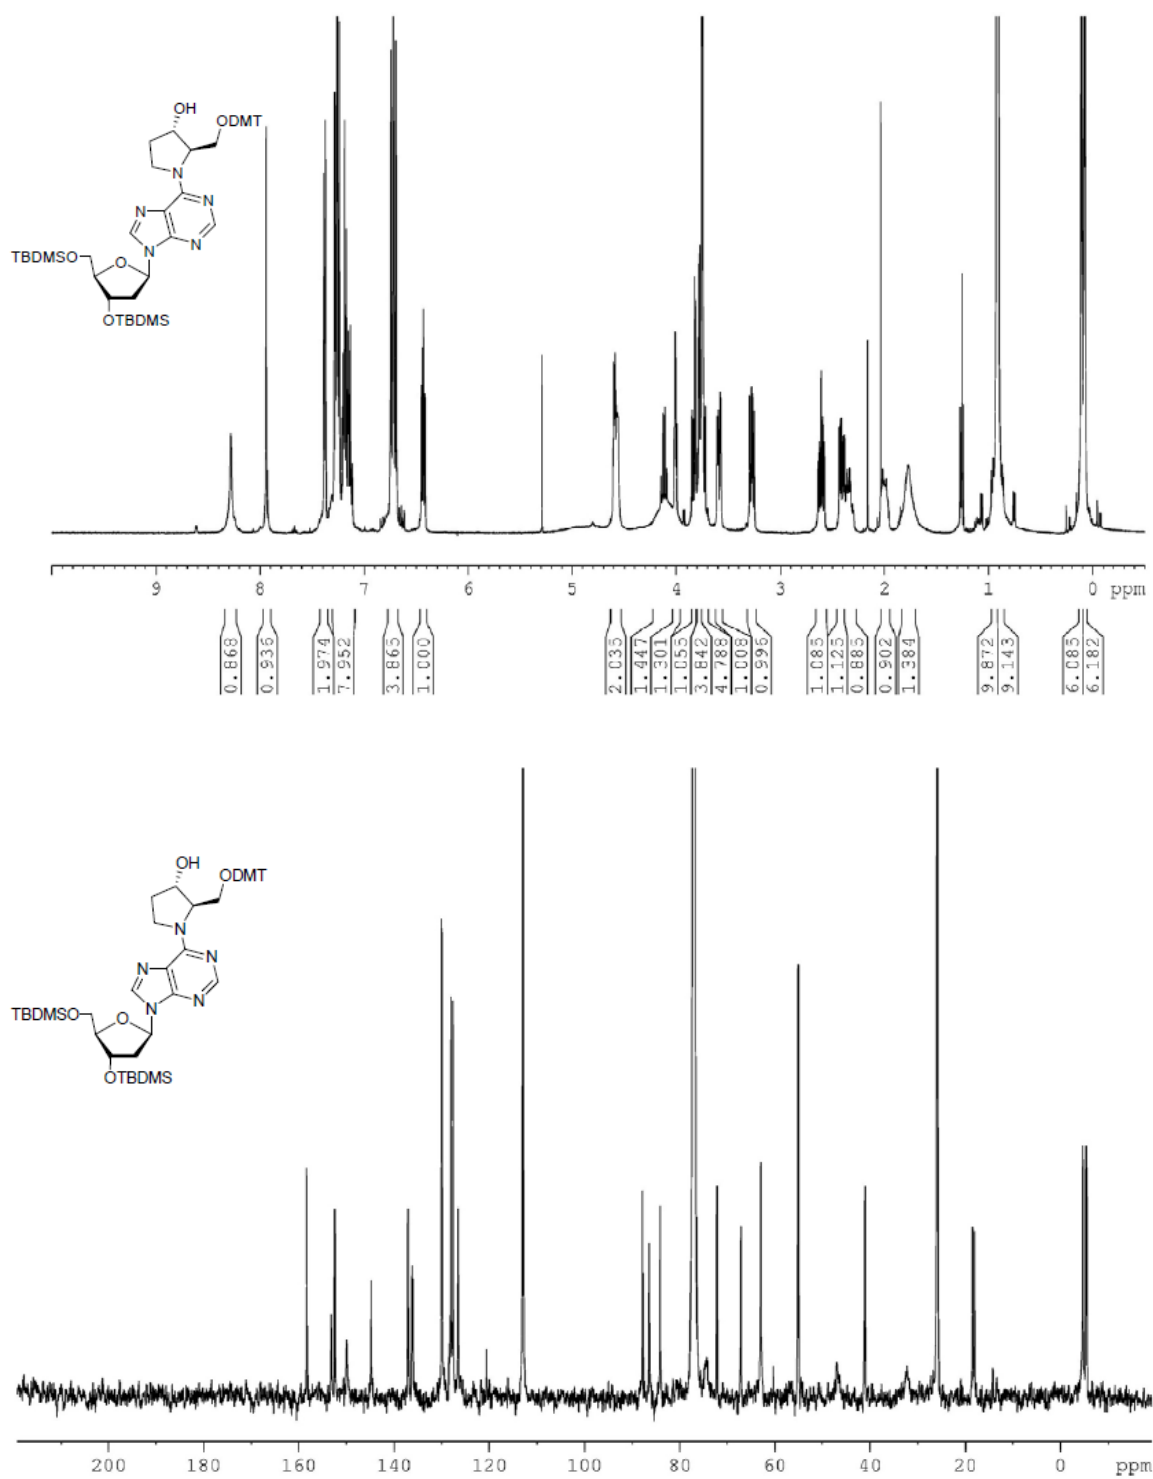

**Figure S11.**  $^1\text{H}$  and  $^{13}\text{C}$  NMR spectra of DMT protected **28**.

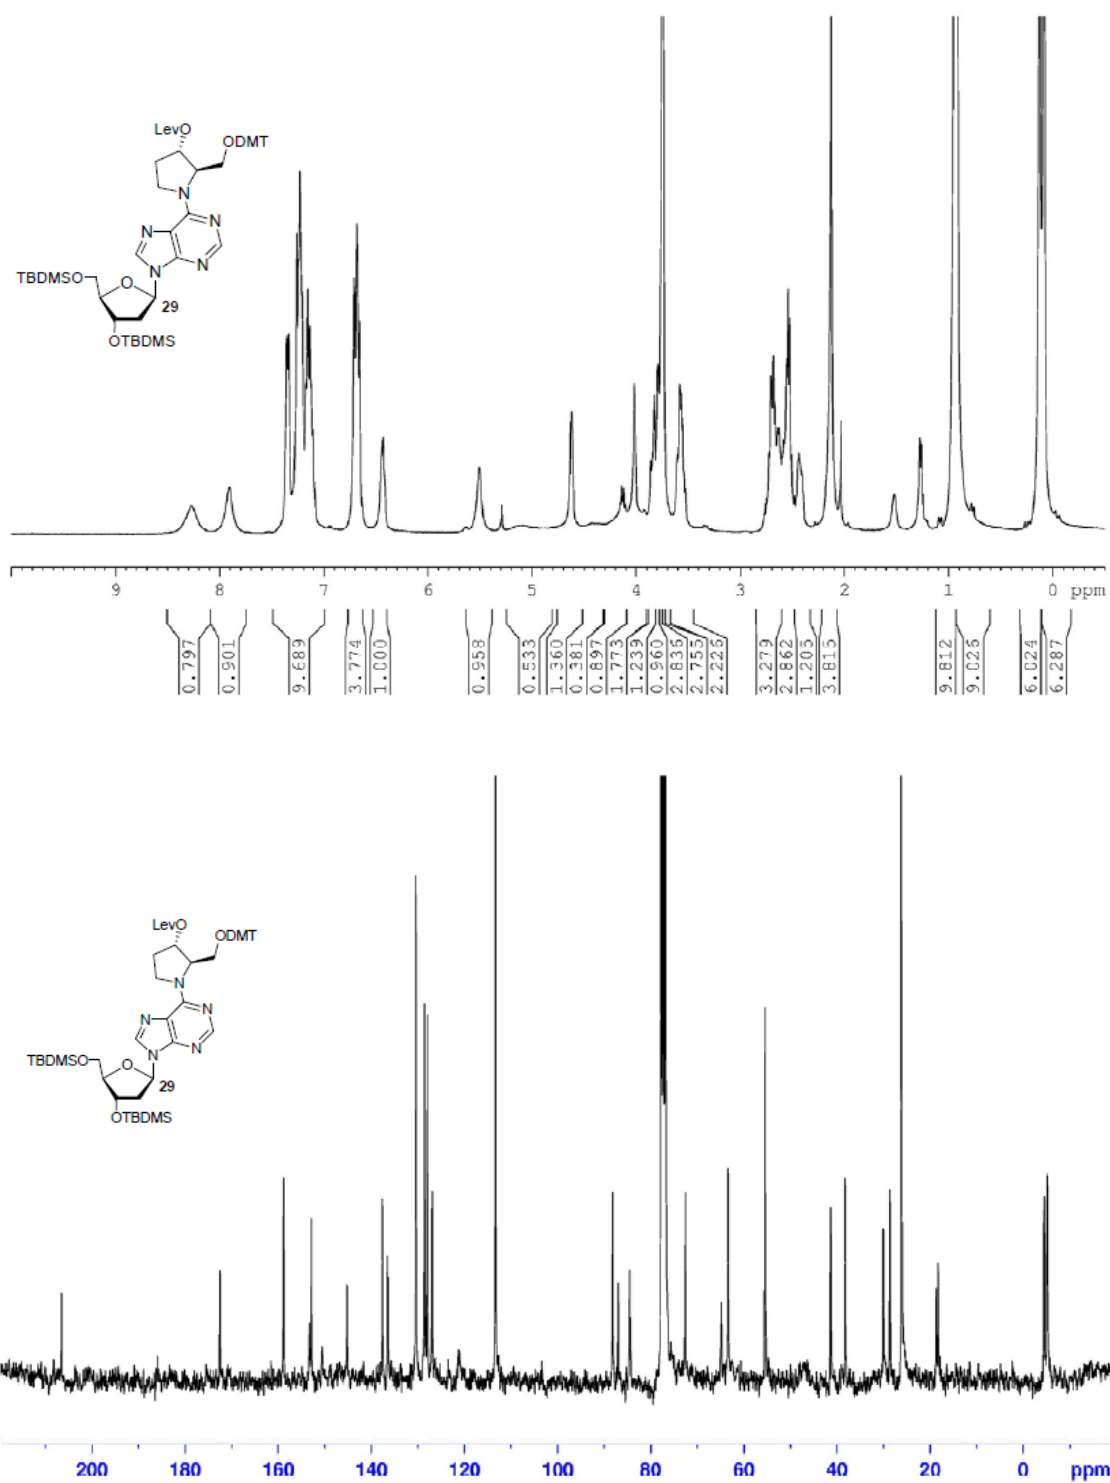

Figure S12.  $^1\text{H}$  and  $^{13}\text{C}$  NMR spectra of **29**.

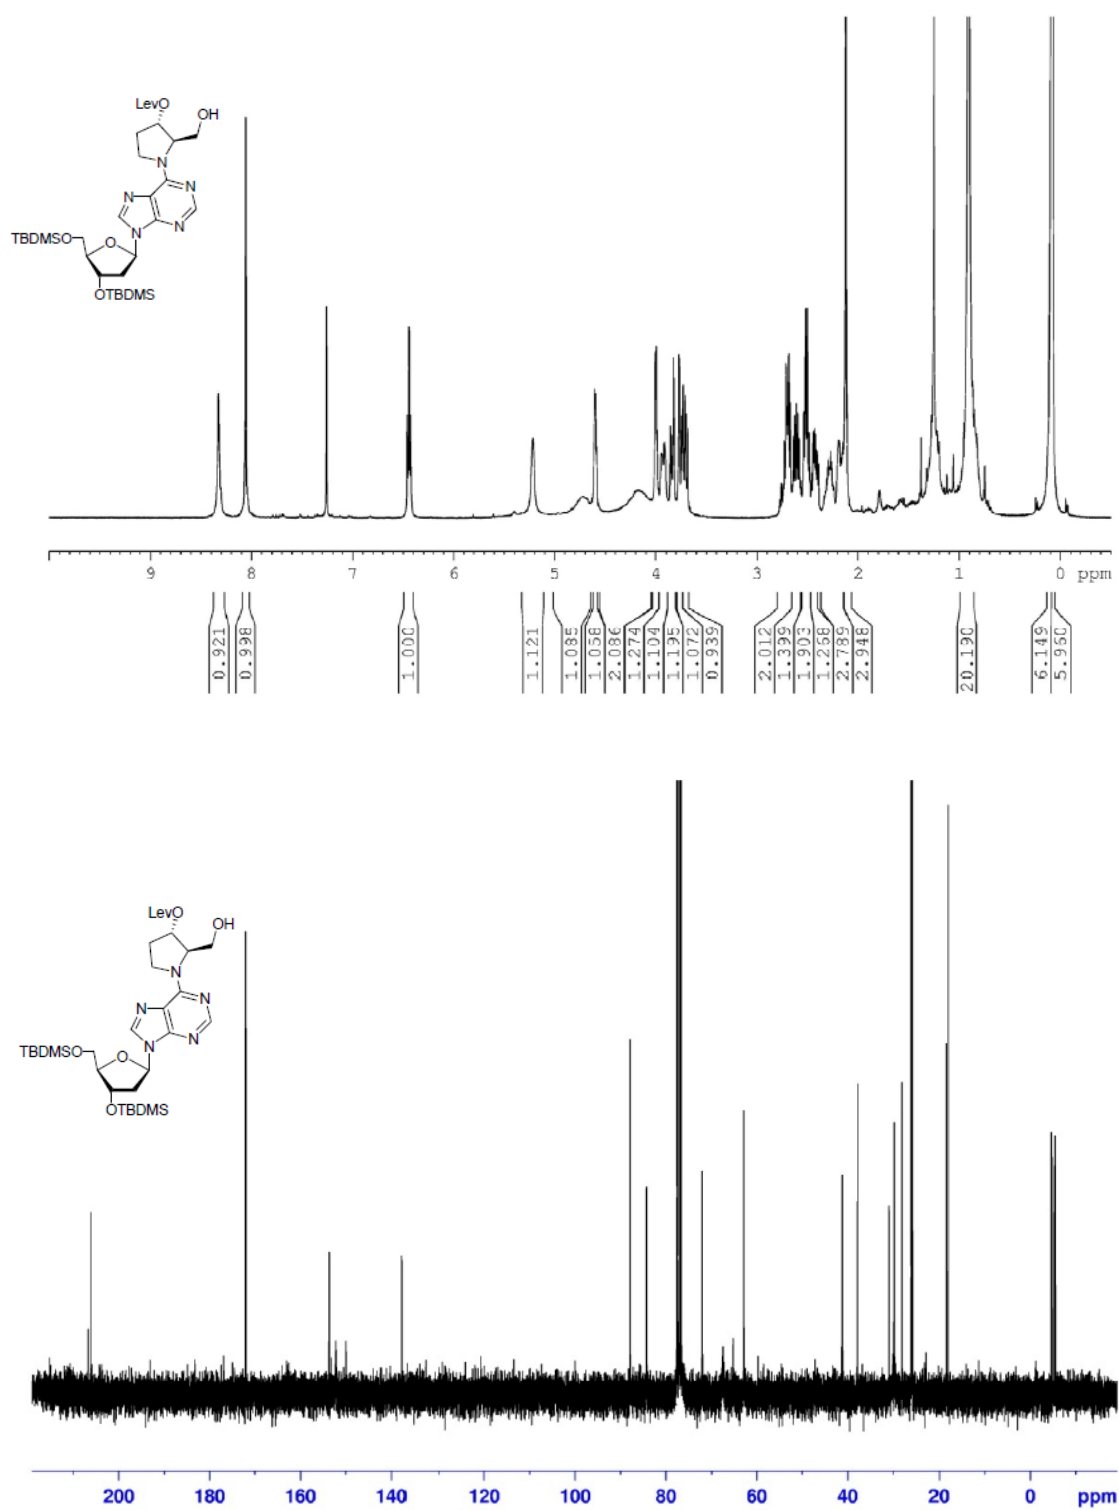

**Figure S13.** <sup>1</sup>H and <sup>13</sup>C NMR spectra of DMT deprotected 29.

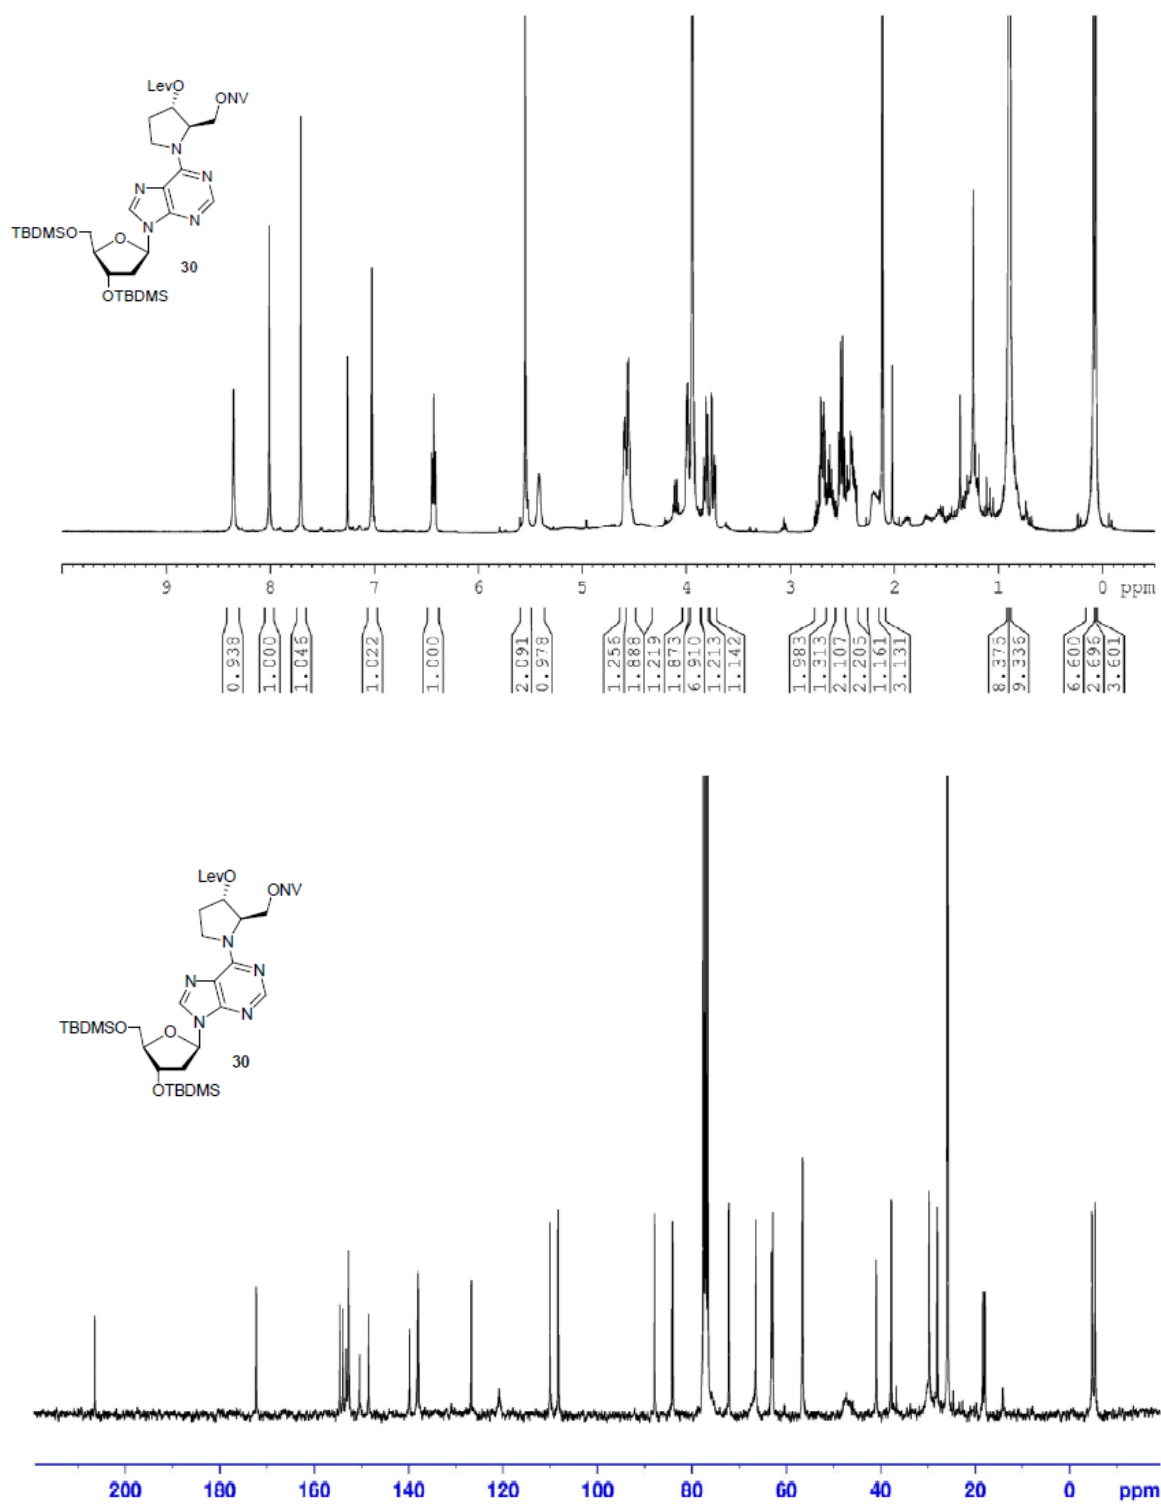

Figure S14.  $^1\text{H}$  and  $^{13}\text{C}$  NMR spectra of 30.

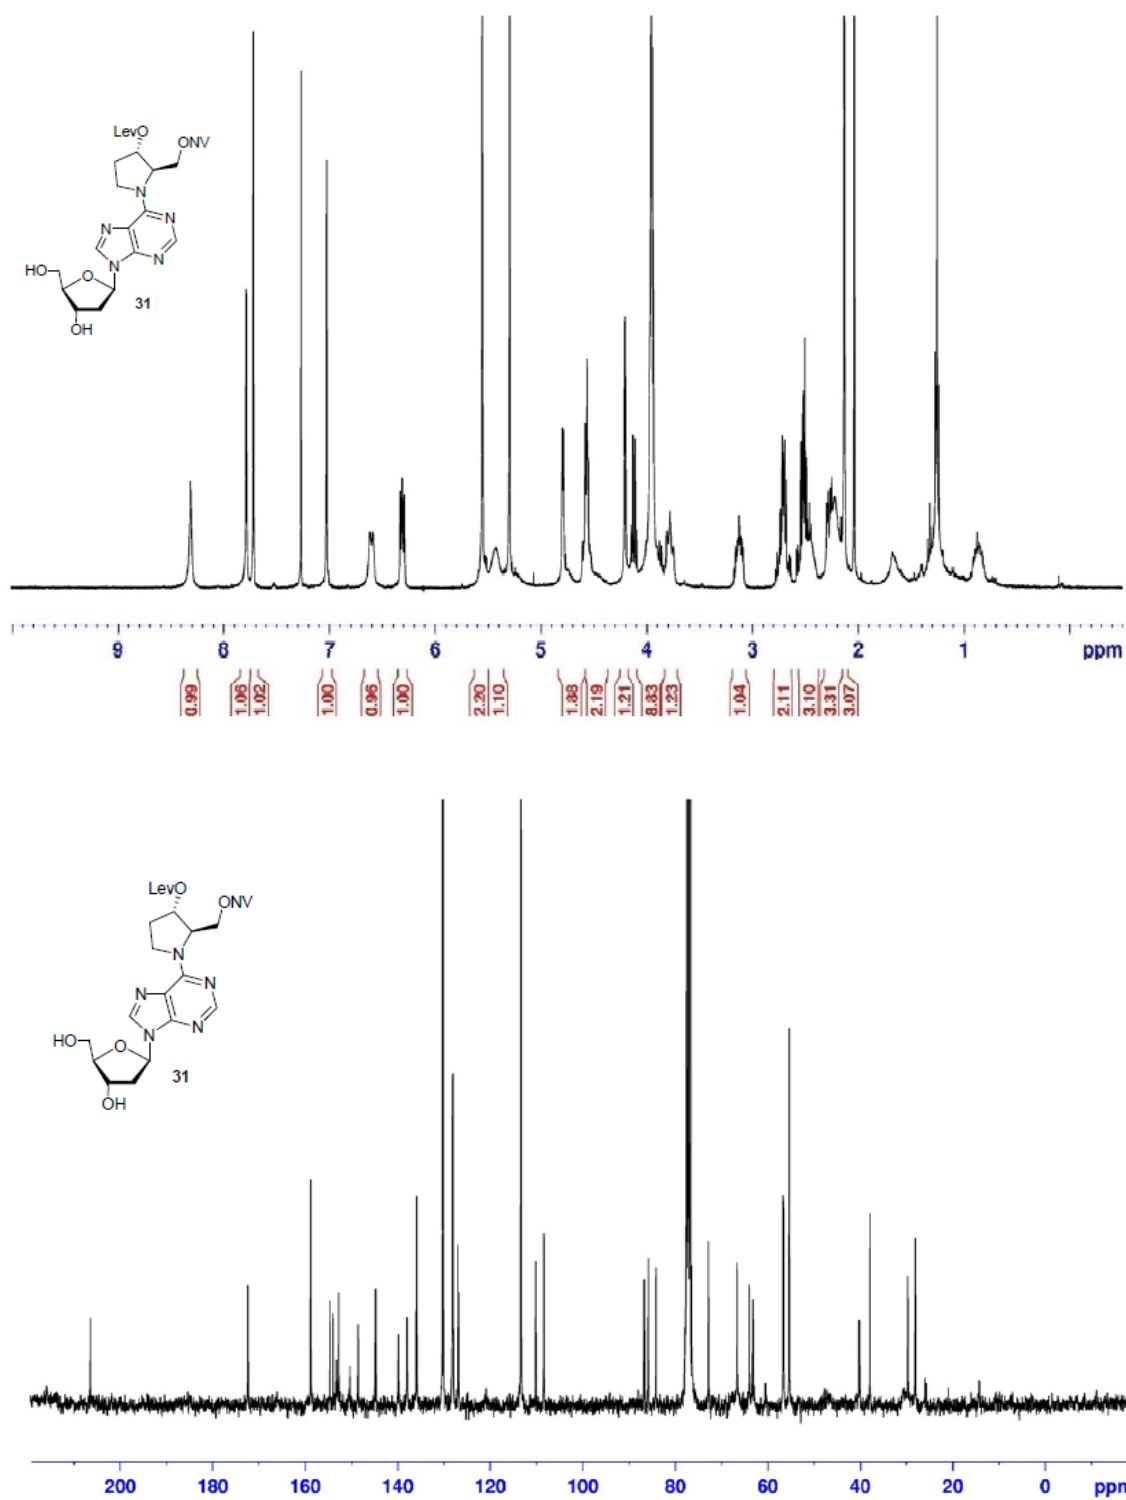

Figure S15.  $^1\text{H}$  and  $^{13}\text{C}$  NMR spectra of 31.



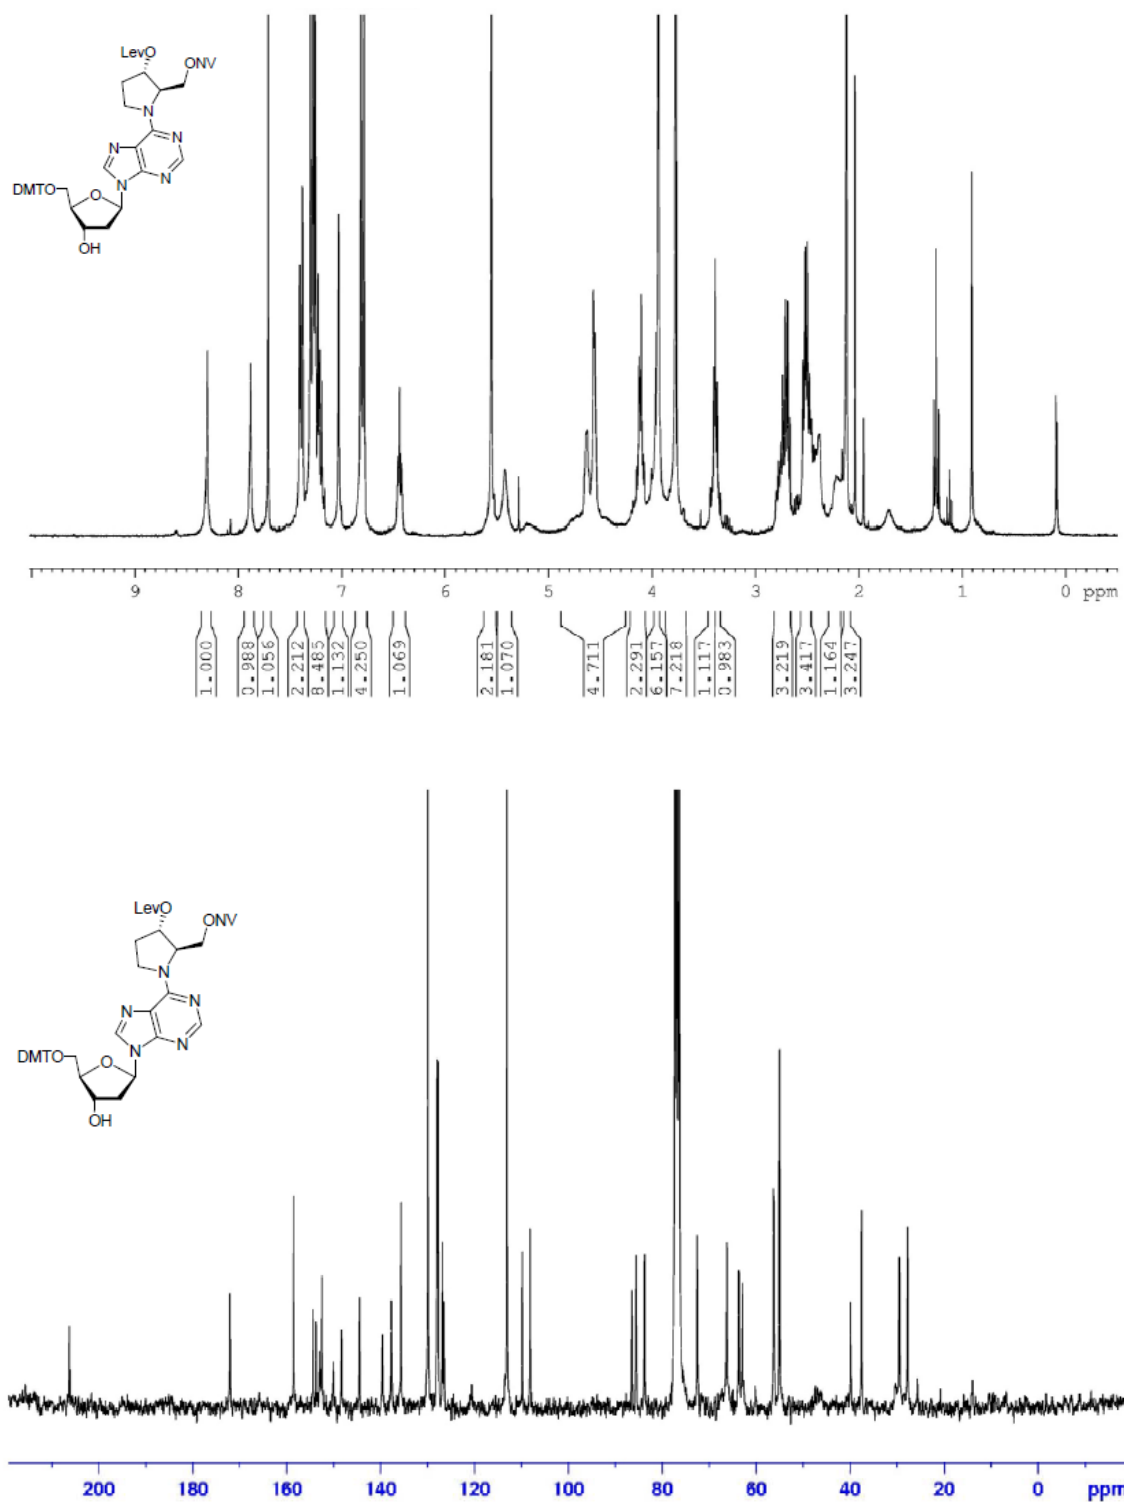

**Figure S16.**  $^1\text{H}$  and  $^{13}\text{C}$  NMR spectra of DMT protected 31.

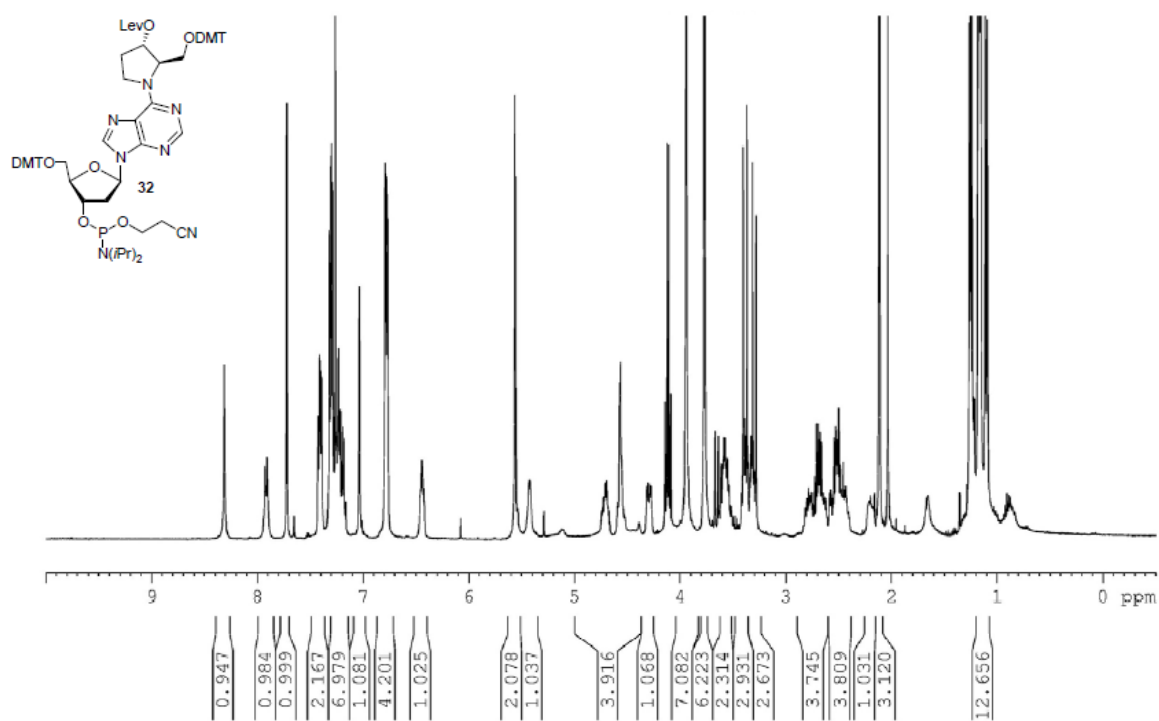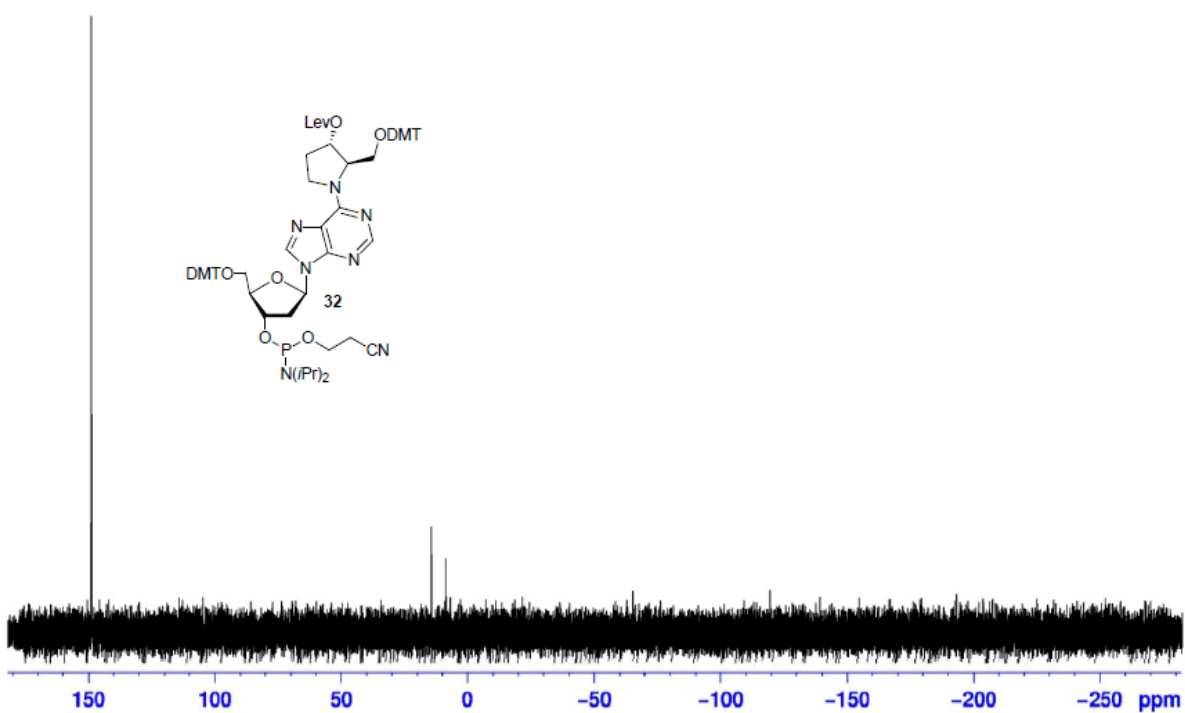

Figure S17. <sup>1</sup>H and <sup>31</sup>P NMR spectra of 32.

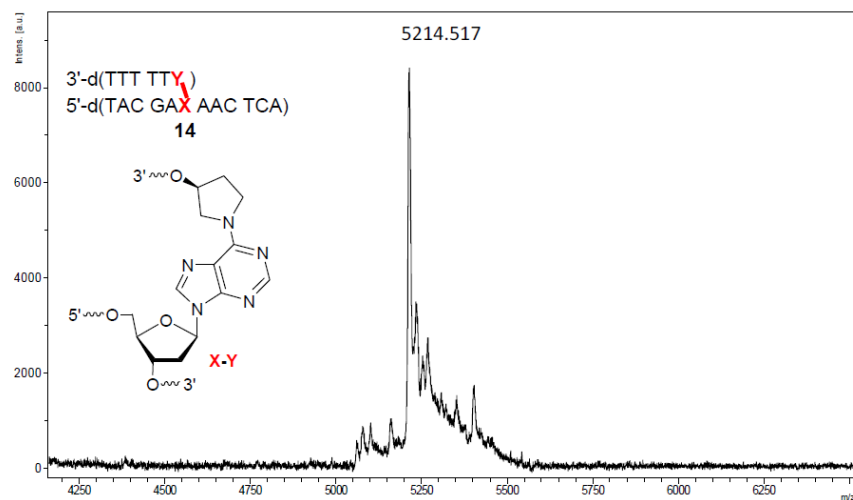

**Figure S18.** MALDI-TOF-MS of **14**. Calc'd mass 5213.422, observed mass 5214.517.

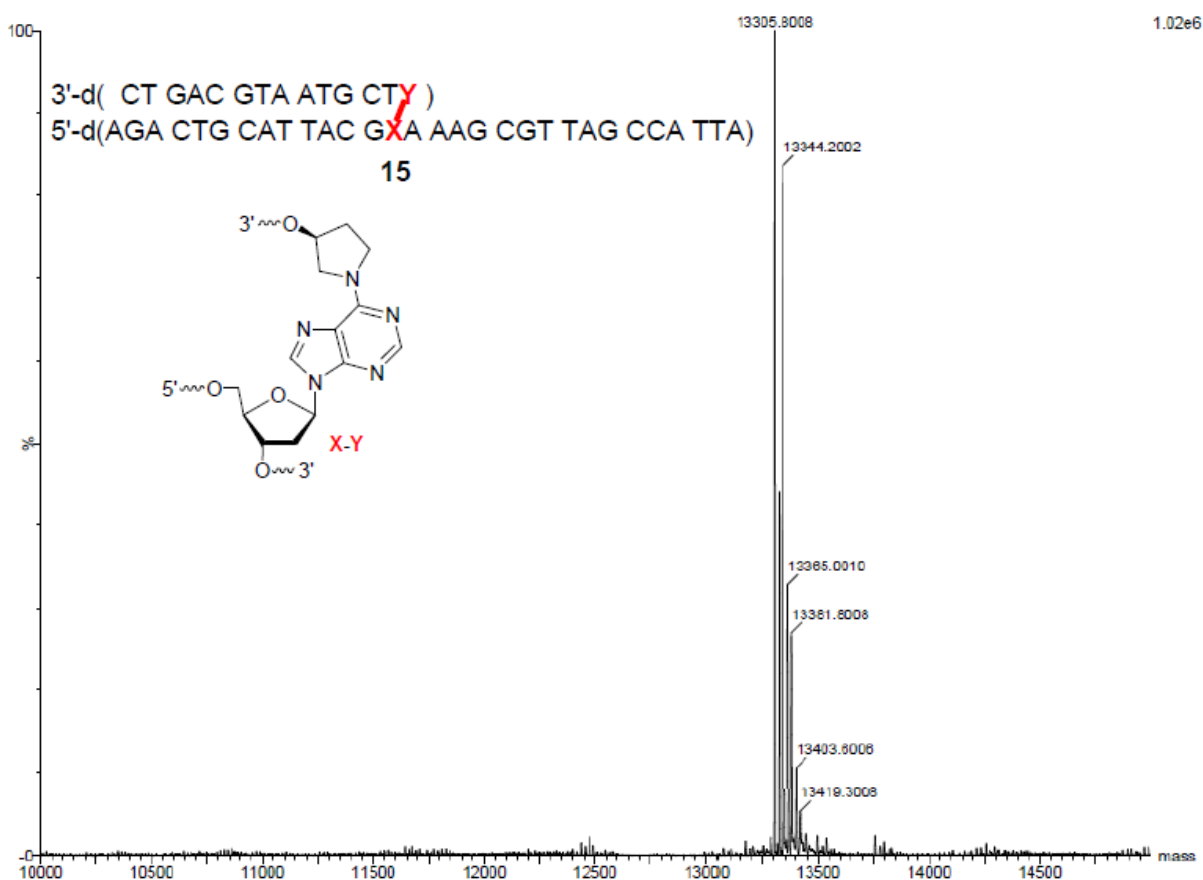

**Figure S19.** ESI-MS of **15**. Calc'd mass 13304.603, observed mass 13305.800, 13344.200 [M + K]<sup>+</sup>, 13365.001 [M + K + Na]<sup>+</sup>, 13381.800 [M + 2K]<sup>+</sup>, 13403.600 [M + 2K + Na]<sup>+</sup>, 13419.300 [M + 3K]<sup>+</sup>.

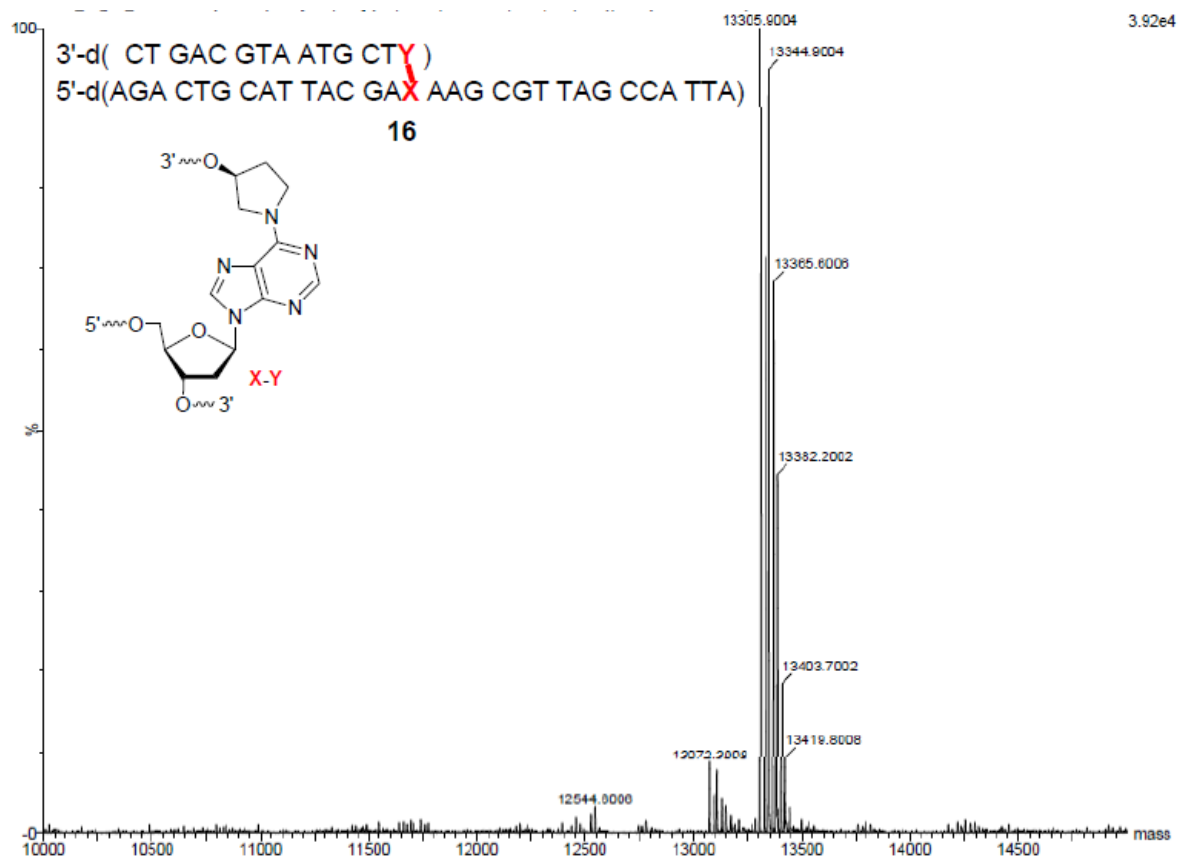

**Figure S20.** ESI-MS of **16**. Calc'd mass 13304.603, observed mass 13305.900, 13344.900 [M + K]<sup>+</sup>, 13365.601 [M + K + Na]<sup>+</sup>, 13382.200 [M + 2K]<sup>+</sup>, 13403.700 [M + 2K + Na]<sup>+</sup>, 13419.800 [M + 3K]<sup>+</sup>.

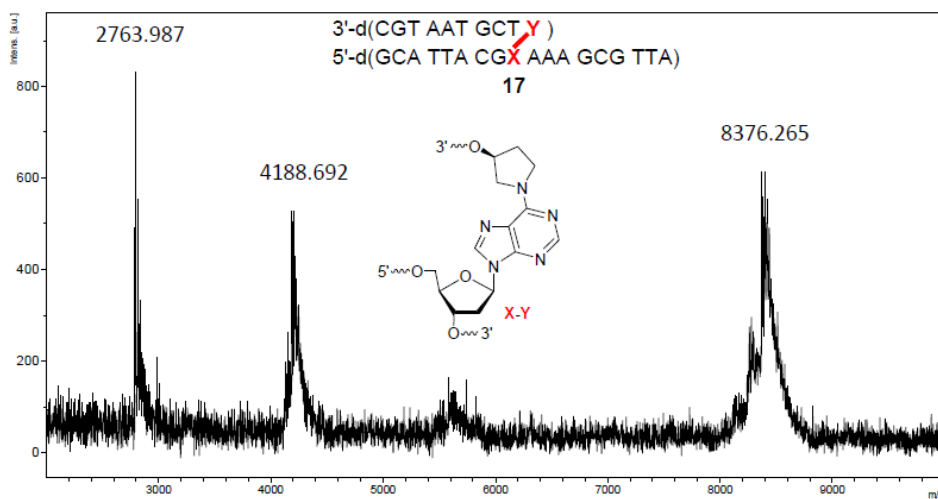

**Figure S21.** MALDI-TOF-MS of **17**. Calc'd mass 8377.514, observed mass 2763.987 ( $z = -3$ ), 4188.692 ( $z = -2$ ), 8376.265.

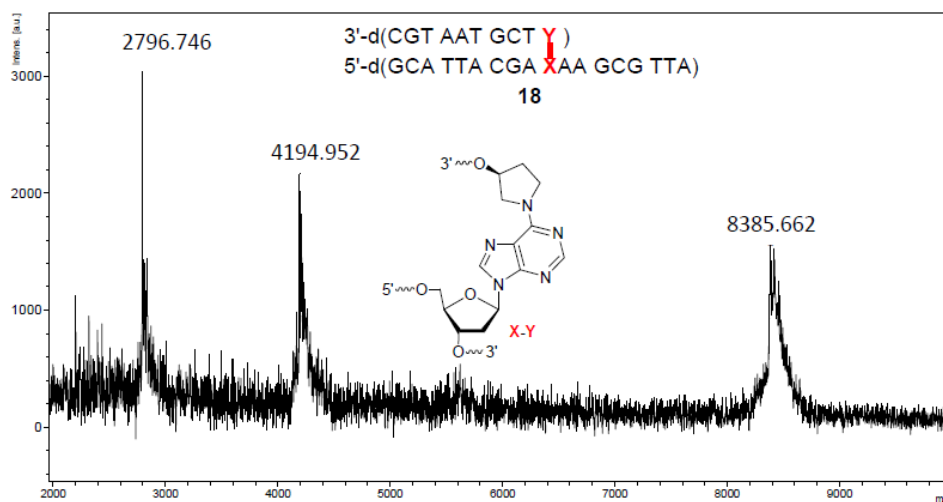

**Figure S22.** MALDI-TOF-MS of **18**. Calc'd mass 8377.514, observed mass 2796.987 ( $z = -3$ ), 4194.692 ( $z = -2$ ), 8385.662.

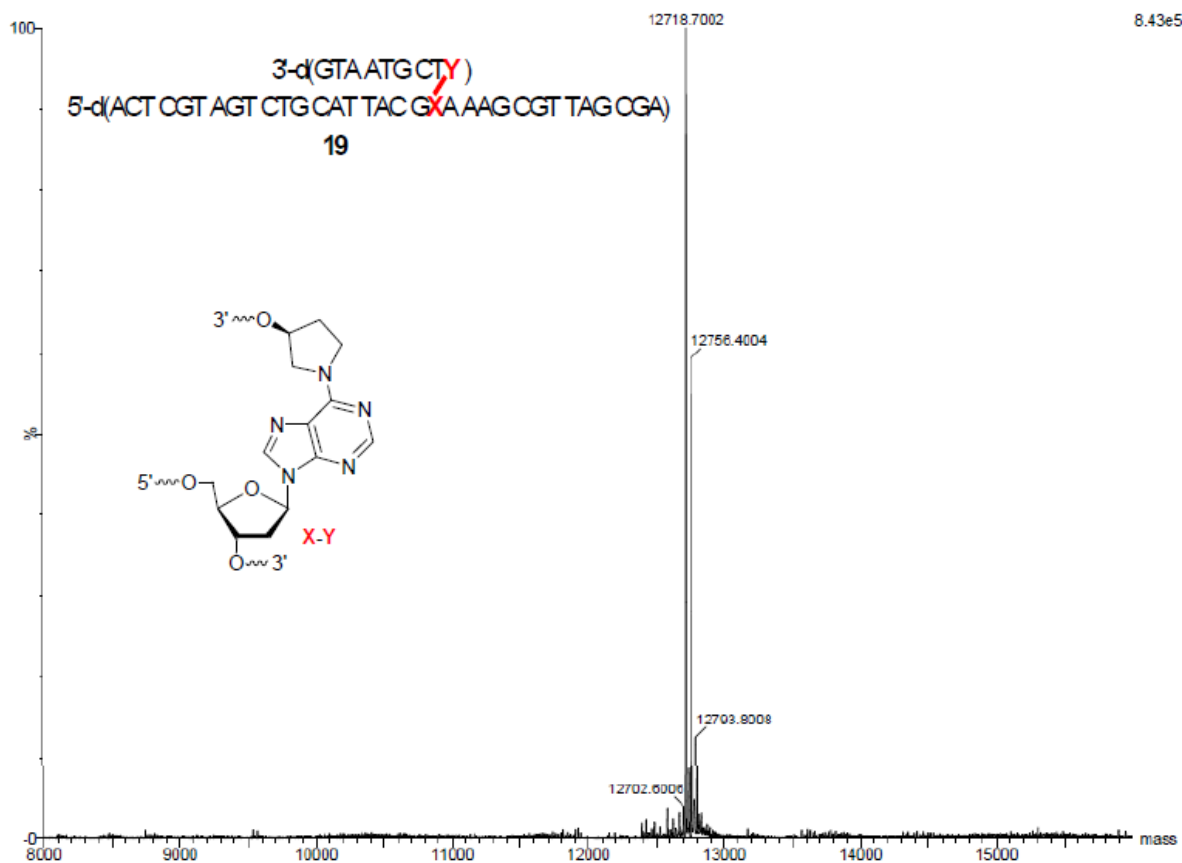

**Figure S23.** ESI-MS of **19**. Calc'd mass 12718.312, observed mass 12718.700, 12756.400 [ $M + K$ ]<sup>+</sup>, 12793.800 [ $M + 2K$ ]<sup>+</sup>.

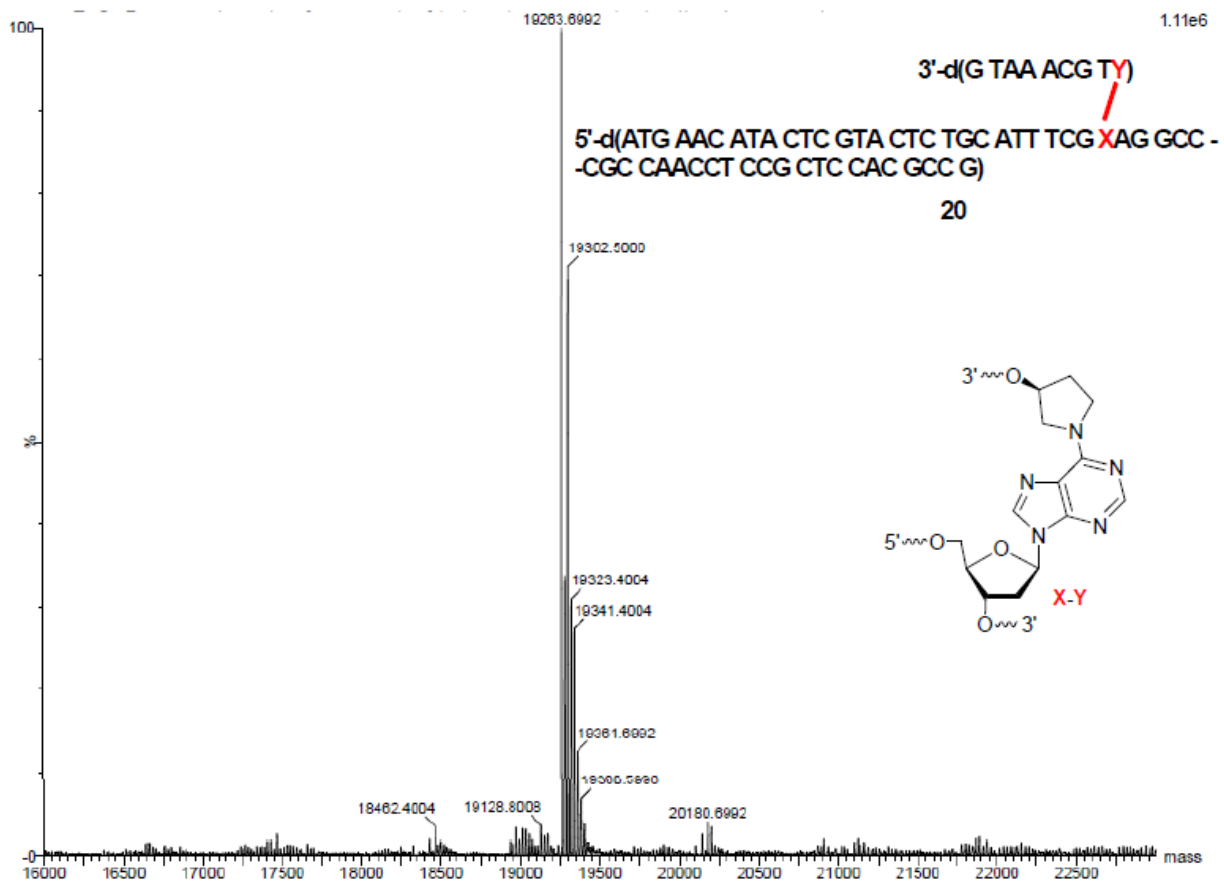

**Figure S24.** ESI-MS of **20**. Calc'd mass 19262.492, observed mass 19263.699, 19302.500 [M + K]<sup>+</sup>, 19223.400 [M + K + Na]<sup>+</sup>, 19341.400 [M + 2K]<sup>+</sup>, 19361.699 [M + 2K + Na]<sup>+</sup>, 19380.599 [M + 3K]<sup>+</sup>.

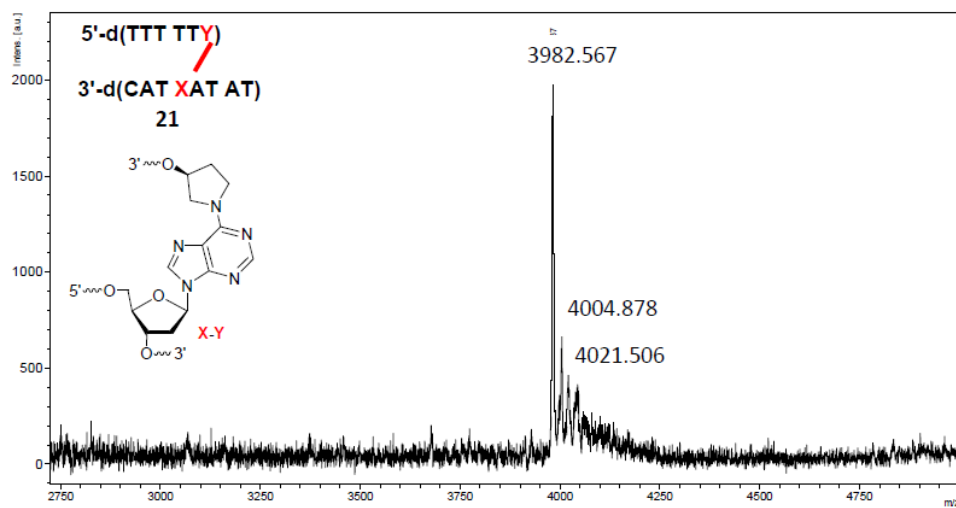

**Figure S25.** MALDI-TOF-MS of **21**. Calc'd mass 3983.611, observed mass 3982.567, 4004.878 [M + Na]<sup>+</sup>, 4021.506 [M + K]<sup>+</sup>.

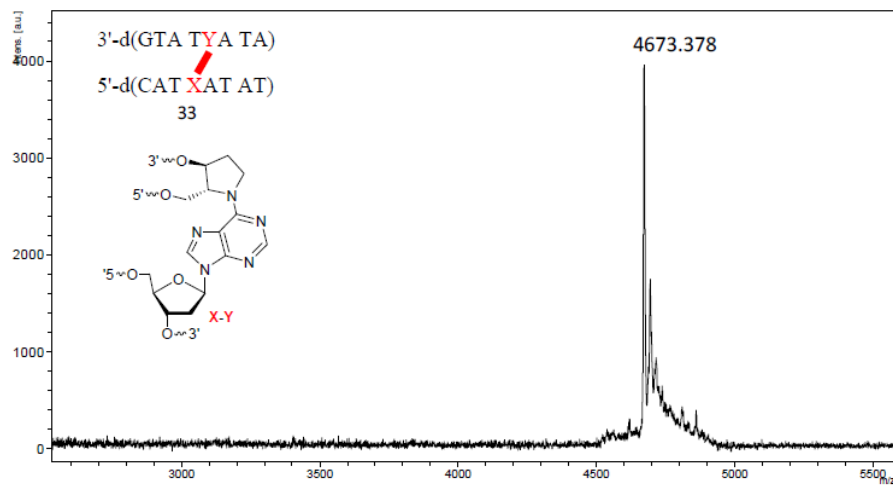

**Figure S26.** MALDI-TOF-MS of **33**. Calc'd mass 4674.102, observed mass 4673.378.

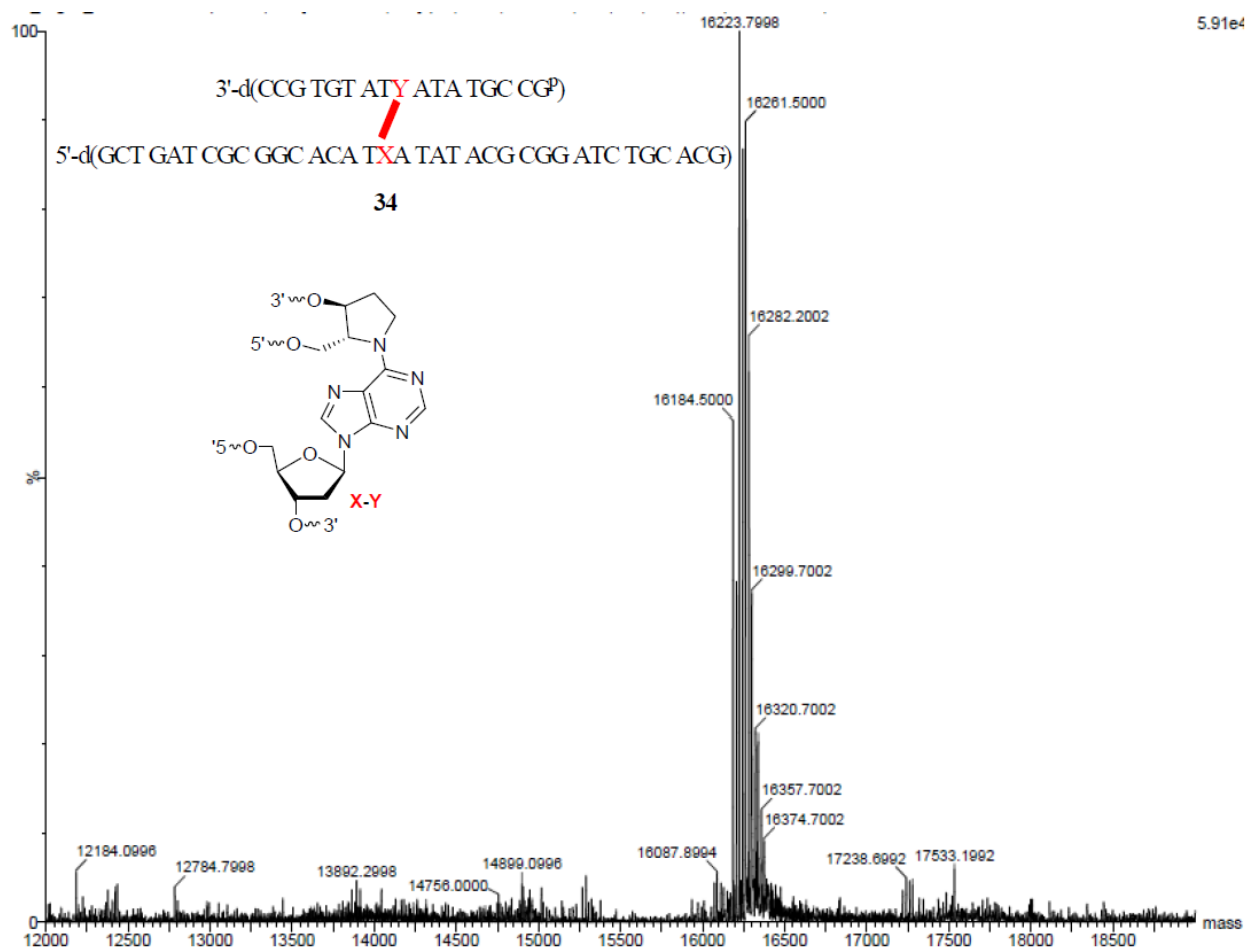

**Figure S27.** ESI-MS of **34**. Calc'd mass 16182.485, observed mass 16184.500, 16223.799 [M + K]<sup>+</sup>, 16261.500 [M + 2K]<sup>+</sup>, 16282.200 [M + 2K + Na]<sup>+</sup>, 16299.700 [M + 3K]<sup>+</sup>, 16320.700 [M + 3K + Na]<sup>+</sup>, 16357.700 [M + 4K + Na]<sup>+</sup>, 16374.700 [M + 5K]<sup>+</sup>.



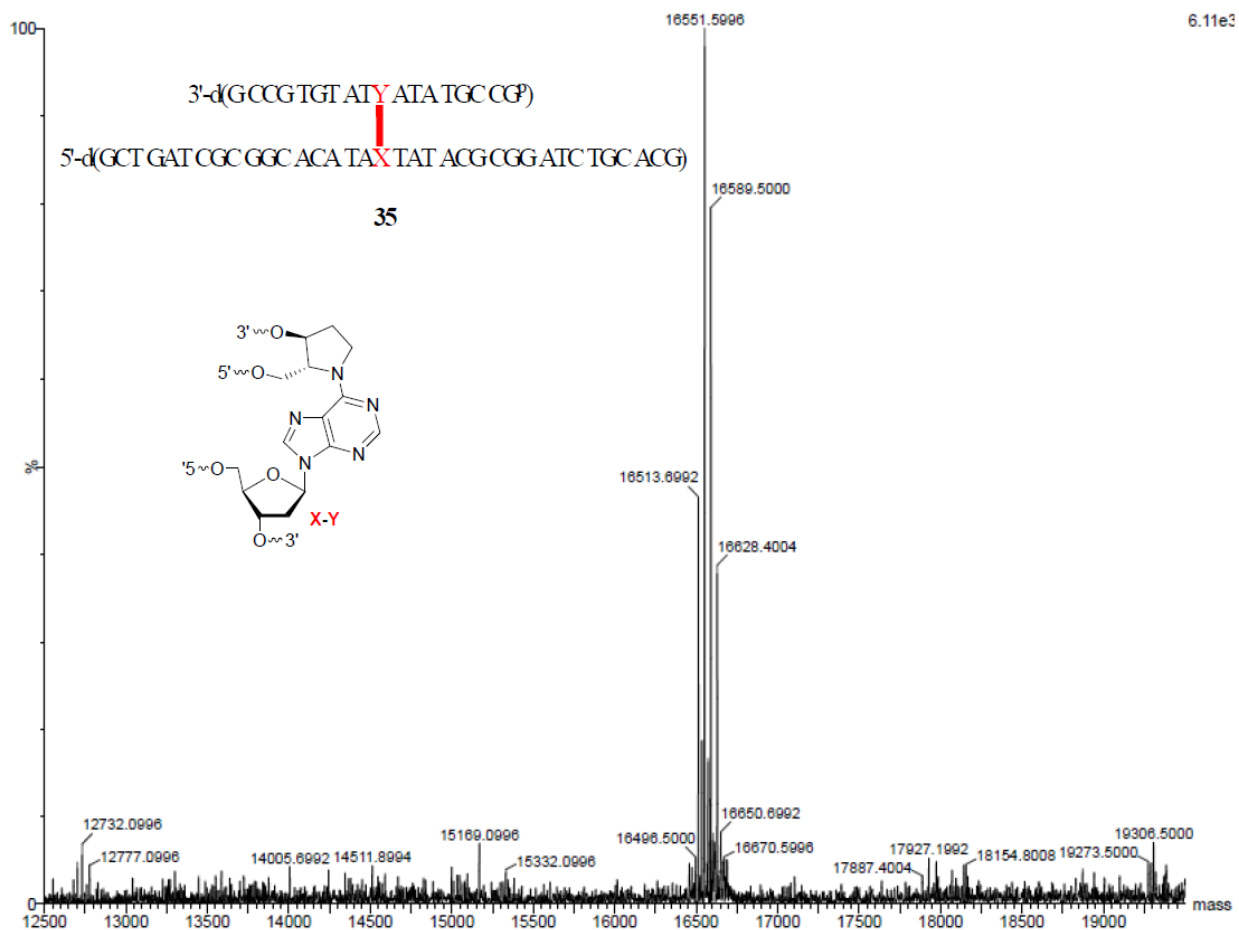

**Figure S28.** ESI-MS of **35**. Calc'd mass 16511.658, observed mass 16513.699, 16551.599 [M + K]<sup>+</sup>, 16589.500 [M + 2K]<sup>+</sup>, 16628.400 [M + 3K]<sup>+</sup>.

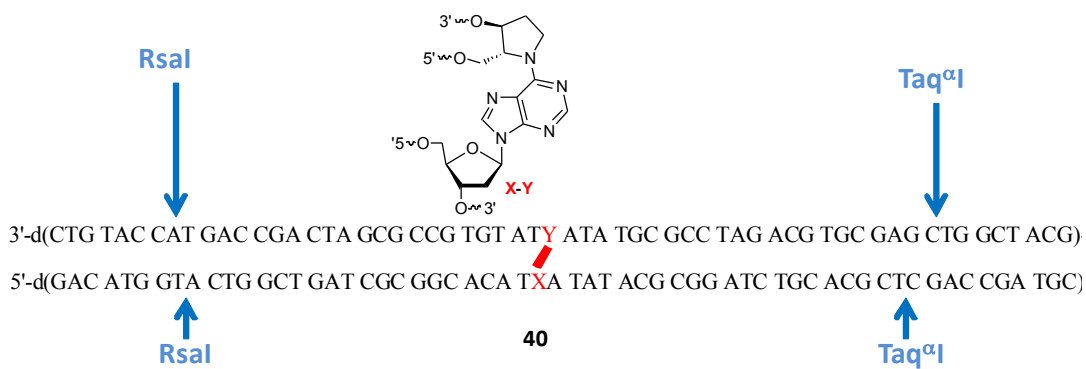

**Figure S29.** RsaI and Taq<sup>I</sup> restriction enzyme sites on **40**.

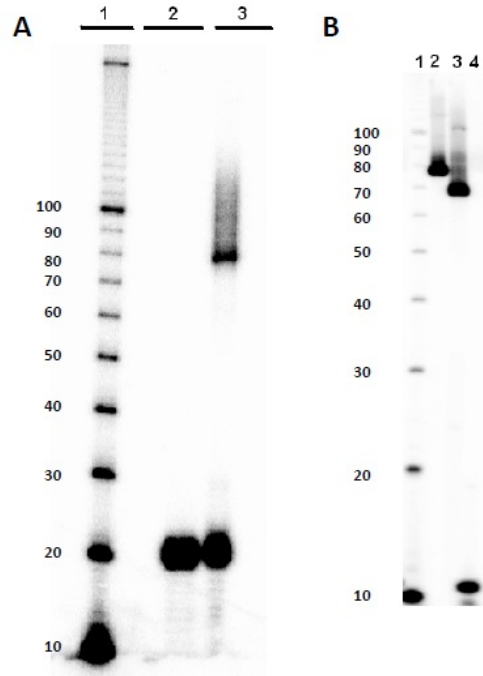

**Figure S30.** Ligation for constructing 5'-<sup>32</sup>P-40 and restriction enzyme treatment of purified 5'-<sup>32</sup>P-40. (Panel A) Representative 12% denaturing PAGE gel showing the ligation to construct 5'-<sup>32</sup>P-40. Lane 1, 10 base pair DNA ladder. Lane 2, 5'-<sup>32</sup>P-38. Lane 3, crude reaction to produce 5'-<sup>32</sup>P-40. (Panel B) Representative 15% denaturing PAGE gel analysis of restriction enzyme treatment of purified 5'-<sup>32</sup>P-40. Lane 1, 10 base pair DNA ladder. Lane 2, 5'-<sup>32</sup>P-40 without any treatment. Lane 3, 5'-<sup>32</sup>P-40 treated with RsaI. Lane 4, 5'-<sup>32</sup>P-40 treated with TaqI.
